# Supplementary material for: Electrochemical [3 + 2] cycloaddition of anilines and enamine ketones: construction of 3-benzoylindole derivatives
Source: Royal Society of Chemistry journal article supplement (doi:10.1039/d5ob00831j), 2025-01-01

## Supplementary Information

# Electrochemical [3+2] Cycloaddition of Anilines and Enamine ketone: Construction of 3-benzoylindole derivatives

Yangyang Hu,<sup>‡a</sup> Chunlei Yu,<sup>‡b</sup> Ya'nan Ran,<sup>a</sup> Miao Yu,<sup>a</sup> Jingwen Sun,<sup>a</sup> Huiying Liu,<sup>a</sup> Jiahui Zhang<sup>a</sup>,

Haijun Wang<sup>a</sup> and Lei Liu<sup>\*a</sup>

<sup>a</sup>College of Pharmacy, Qiqihar Medical University, Qiqihar, Heilongjiang, 161006, P. R. China

<sup>b</sup>The Institute of Medicine, Qiqihar Medical University, Qiqihar, Heilongjiang, 161006, P. R.  
China

### Table of Contents

|   |                                                    |     |
|---|----------------------------------------------------|-----|
| 1 | General Information                                | S1  |
| 2 | General procedure of the synthesis of the products | S1  |
| 3 | Further functionalization of product               | S2  |
| 4 | Cyclic voltammetry studies                         | S4  |
| 5 | Spectra data of products                           | S5  |
| 6 | NMR spectra                                        | S15 |

## 1. General Information

Compounds and solvents were purchased from commercial sources and were used as received without further purification unless stated otherwise. All products were purified by flash chromatography on silica gel (200-300 mesh). The chemical yields referred are isolated products.  $^1\text{H}$  NMR spectra were recorded at 600 MHz,  $^{13}\text{C}$  NMR spectra were recorded at 150 MHz,  $^{19}\text{F}$  NMR spectra were recorded at 470 MHz (Bruker Avance). Chemical shifts are reported in part per million (ppm) relative to residual solvent of  $\text{CDCl}_3$  (7.26 ppm for  $^1\text{H}$  NMR, 77.16 ppm for  $^{13}\text{C}$  NMR). The used abbreviations are as follows: s (singlet), d (doublet), t (triplet), dd (double of doublet), dt (doublet of triplet), m (multiplet). Multiplets which arise from accidental equality of coupling constants of magnetically non-equivalent protons are marked as virtual (*virt.*). High resolution mass spectra (HRMS) data were measured on a FT-ICR-MS Solarix 7T. Reactions were monitored by TLC analysis using silica gel 60 Å F-254 thin layer plates and compounds were visualized with a UV light at 254 nm or 365 nm. Flash column chromatography was performed on silica gel 60 Å, 10-40  $\mu\text{m}$ . CV curves were recorded using a three-electrode scheme. The working electrode was a glassy carbon electrode, A platinum electrode served as counter electrode. Ag/AgCl (KCl sat'd) was used as the reference electrode. The working electrode was polished before recording each CV curve.

## 2. General procedure of the synthesis of the products

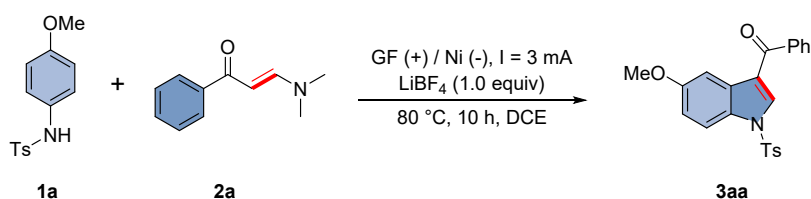

In an undivided cell constructed from non-borosilicate glass and equipped with a magnetic stirrer, a nickel plate ( $1.5 \times 1.0 \text{ cm}^2$ ) served as the cathode, while a graphite felt ( $1.5 \times 1.0 \text{ cm}^2$ ) acted as the anode. Substrate aniline **1a** (0.3 mmol, 1.0 equiv.), enamine **2a** (0.6 mmol, 2.0 equiv.), and the electrolyte  $\text{LiBF}_4$  (0.3 mmol, 1.0 equiv.) were introduced into the solvent DCE (6 mL). The reaction proceeded under a constant current of 3 mA, with the internal temperature maintained at approximately 80 °C. Upon completion, the solvent was removed using a rotary evaporator. The remaining crude product was then purified by silica gel column chromatography

with a petroleum ether/ethyl acetate solvent system ((PE/EA = 10:1) to yield the corresponding product.

### 3. Further functionalization of product

#### (a) The synthesis of 3c

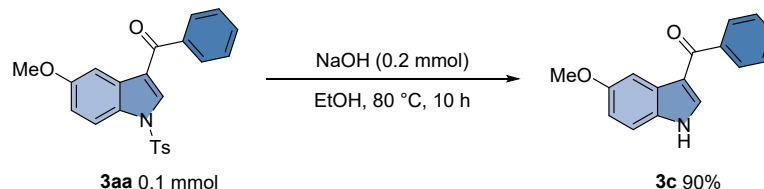

**3aa** (0.1 mmol, 1.0 equiv.) and sodium hydroxide (NaOH, 0.2 mmol, 2.0 equiv.) were sequentially added to a 25 mL round-bottom flask charged with 10 mL of anhydrous ethanol, and the mixture was stirred thoroughly to ensure complete dissolution. The reaction flask was then placed in a thermostatically controlled oil bath, gradually heated to 80 °C, and maintained at this temperature under vigorous stirring for 10 hours. The reaction progress was monitored by thin-layer chromatography every 2 hours using a petroleum ether/ethyl acetate mixture (v/v = 5:1) as the eluent until the starting material spot disappeared, indicating reaction completion. After cooling to room temperature, the ethanol solvent was removed under reduced pressure via rotary evaporation to yield the crude product. Purification was carried out by silica gel column chromatography with a gradient elution system of petroleum ether/ethyl acetate (v/v from 10:1 to 7:1), and the target fractions were collected and concentrated under reduced pressure to afford the final pure product.

#### (b) The synthesis of 4a

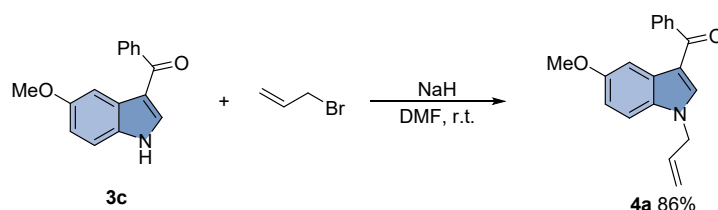

(5-Methoxy-1*H*-indol-3-yl)(phenyl)methanone (**3c**, 0.1 mmol, 1.0 equiv.) was added to a dry 50 mL round-bottom flask charged with 10 mL of anhydrous N,N-dimethylformamide (DMF), followed by the slow addition of sodium hydride (NaH, 0.15 mmol, 1.5 equiv.). The mixture was

stirred at room temperature for 30 minutes. Allyl bromide (0.2 mmol, 2.0 equiv.) was then slowly added dropwise to the reaction mixture, and stirring was continued at room temperature. The reaction progress was monitored every hour by thin-layer chromatography using a petroleum ether/ethyl acetate mixture (v/v = 5:1) as the eluent until the starting material spot disappeared, indicating completion. After quenching the reaction with 10 mL of water, the mixture was extracted three times with ethyl acetate (20 mL each). The combined organic layers were washed with 20 mL of saturated brine, dried over anhydrous sodium sulfate, and filtered. The solvent was removed under reduced pressure via rotary evaporation to yield the crude product. Purification was performed by silica gel column chromatography using a gradient elution system of petroleum ether/ethyl acetate (v/v from 10:1 to 7:1). The target fractions were collected and concentrated under reduced pressure to afford the final pure product.

#### (c) The synthesis of 4b

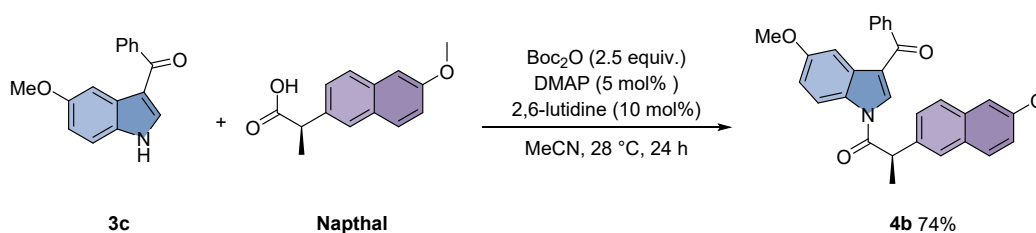

Intermediate (5-methoxy-1*H*-indol-3-yl)(phenyl)methanone (**3c**, 0.2 mmol, 1.0 equiv.), naproxen (0.4 mmol, 2.0 equiv.), di-tert-butyl dicarbonate (Boc<sub>2</sub>O, 0.2 mmol, 1.0 equiv.), 4-dimethylaminopyridine (DMAP, 5 mol%), and 2,6-lutidine (10 mol%) were sequentially added to a dry 50 mL round-bottom flask charged with 10 mL of acetonitrile. The reaction mixture was stirred at 28 °C for 24 hours, with aliquots withdrawn every 4 hours to monitor progress by thin-layer chromatography using a petroleum ether/ethyl acetate mixture (v/v = 3:1) as the eluent until the starting material spot disappeared, confirming completion. The acetonitrile was subsequently removed under reduced pressure to afford the crude product, which was purified via silica gel column chromatography using a gradient elution system of ethyl acetate/petroleum ether (v/v = 6:1). The target compound 4b was collected and concentrated under reduced pressure to yield the final product.

#### (d) The synthesis of 4c

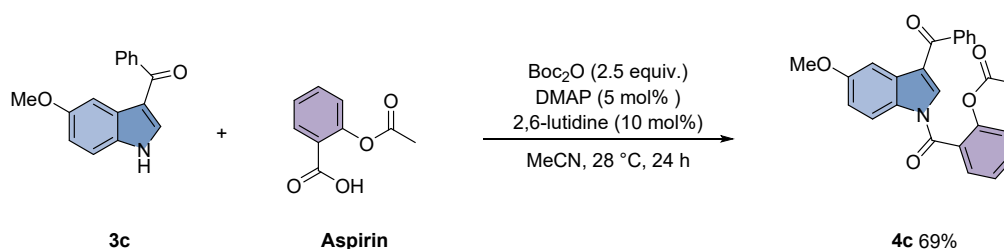

Intermediate (5-methoxy-1*H*-indol-3-yl)(phenyl)methanone (**3c**, 0.2 mmol, 1.0 equiv.), aspirin (0.4 mmol, 2.0 equiv.), di-*tert*-butyl dicarbonate ( $\text{Boc}_2\text{O}$ , 0.2 mmol, 1.0 equiv.), 4-dimethylaminopyridine (DMAP, 5 mol%), and 2,6-lutidine (10 mol%) were sequentially added to a dry 50 mL round-bottom flask charged with 10 mL of acetonitrile. The reaction mixture was stirred at 28 °C for 24 hours, with aliquots withdrawn every 4 hours to monitor progress by thin-layer chromatography using a petroleum ether/ethyl acetate mixture (v/v = 4:1) as the eluent until the starting material spot disappeared, confirming completion. The acetonitrile was subsequently removed under reduced pressure to afford the crude product, which was purified via silica gel column chromatography using a gradient elution system of ethyl acetate/petroleum ether (v/v = 6:1). The target compound **4c** was collected and concentrated under reduced pressure to yield the final product.

#### 4. Cyclic voltammetry studies.

The cyclic voltammograms were recorded in an electrolyte of  $\text{LiBF}_4$  (0.1 M) in DCE (10.0 mL) using a glassy carbon disk working electrode (diameter, 3 mm), a Ni wire auxiliary electrode and an Ag/AgCl reference electrode. The scan rate is 100 mV/s.

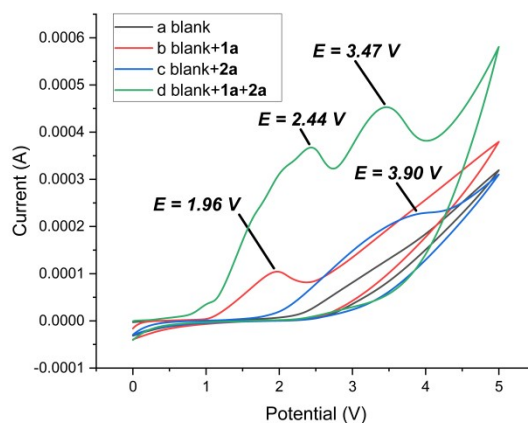

Figure S1. Cyclic voltammograms.

#### 5. Spectra data of products

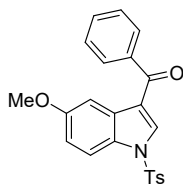

**(5-methoxy-1-tosyl-1*H*-indol-3-yl)(phenyl)methanone(3aa)**

Yellow solid, 80% yield. 97 mg  $^1\text{H}$  NMR (600 MHz, Chloroform-*d*)  $\delta$  7.98 (s, 1H), 7.92 – 7.86 (m, 3H), 7.80 (s, 1H), 7.74 (d,  $J$  = 8.1 Hz, 2H), 7.62 (m, 1H), 7.56 (t,  $J$  = 7.5 Hz, 2H), 7.26 (d,  $J$  = 8.1 Hz, 2H), 7.02 (m, 1H), 3.84 (s, 3H), 2.34 (s, 3H).  $^{13}\text{C}$  NMR (150 MHz, Chloroform-*d*)  $\delta$  191.2, 157.8, 146.0, 139.3, 134.6, 134.2, 132.5, 130.3, 129.7, 129.6, 129.1, 128.8, 127.2, 120.3, 115.9, 114.2, 104.5, 55.8, 21.8. **HRMS (ESI)** calculated for  $\text{C}_{23}\text{H}_{20}\text{NO}_4\text{S}^+$   $[\text{M}+\text{H}]^+$ : 406.1113; found: 406.1112.

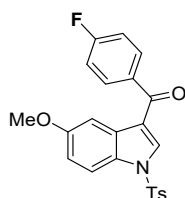

**(4-fluorophenyl)(5-methoxy-1-tosyl-1*H*-indol-3-yl)methanone(3ab)**

Yellow solid, 76 % yield. 96 mg  $^1\text{H}$  NMR (600 MHz, Chloroform-*d*)  $\delta$  7.95 (s, 1H), 7.92 – 7.87 (m, 3H), 7.79 – 7.75 (m, 3H), 7.26 (d,  $J$  = 7.5 Hz, 2H), 7.22 (t,  $J$  = 8.7 Hz, 2H), 7.02 (dd,  $J$  = 9.0, 2.7 Hz, 1H), 3.85 (s, 3H), 2.36 (s, 3H).  $^{13}\text{C}$  NMR (150 MHz, Chloroform-*d*)  $\delta$  189.5, 166.2, 164.5(s,  $J$  = 252.5 Hz), 157.7, 145.9, 134.4, 133.7, 131.5 (d,  $J$  = 8.9 Hz), 130.2, 129.6 (d,  $J$  = 17.6 Hz), 129.5, 127.1, 120.0, 115.9 (d,  $J$  = 5.3 Hz), 115.8, 114.1, 104.3, 55.7, 21.6.  $^{19}\text{F}$  NMR (470 MHz,  $\text{CDCl}_3$ )  $\delta$  - 106.14. **HRMS (ESI)** calculated for  $\text{C}_{23}\text{H}_{19}\text{FNO}_4\text{S}^+$   $[\text{M}+\text{H}]^+$ : 424.1019; found: 424.1021.

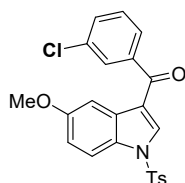

**(3-chlorophenyl)(5-methoxy-1-tosyl-1*H*-indol-3-yl)methanone(3ac)**

Yellow solid, 70 % yield. 92 mg  $^1\text{H}$  NMR (600 MHz, Chloroform-*d*)  $\delta$  7.88 (s, 1H), 7.80 (d,  $J$  = 9.3 Hz, 1H), 7.72 – 7.69 (m, 4H), 7.64 (dt,  $J$  = 7.5, 1.3 Hz, 1H), 7.54 – 7.51 (m, 1H), 7.41 (t,  $J$  = 7.5 Hz, 1H), 7.19 (s, 2H), 6.95 (dd,  $J$  = 9.0, 2.7 Hz, 1H), 3.79 (s, 3H), 2.29 (s, 3H).  $^{13}\text{C}$  NMR (150 MHz, Chloroform-*d*)  $\delta$  189.5, 157.8, 146.0, 140.8, 134.9, 134.4, 134.2, 132.3, 130.3, 130.0, 129.6, 129.4, 128.9, 127.8, 127.1, 119.9, 116.0, 114.1, 104.3, 55.8, 21.7. **HRMS (ESI)** calculated for  $\text{C}_{23}\text{H}_{19}\text{ClNO}_4\text{S}^+$   $[\text{M}+\text{H}]^+$ : 440.0123; found: 440.0120.

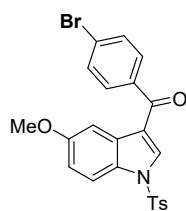

**(4-bromophenyl)(5-methoxy-1-tosyl-1*H*-indol-3-yl)methanone(3ad)**

Yellow solid, 74 % yield. 107 mg  $^1\text{H}$  NMR (600 MHz, Chloroform-*d*)  $\delta$  7.93 (s, 1H), 7.86 (d,  $J$  = 9.3 Hz, 1H), 7.77 (dd,  $J$  = 5.4, 3.0 Hz, 3H), 7.72 (d,  $J$  = 8.1 Hz, 2H), 7.68 (d,  $J$  = 8.1 Hz, 2H), 7.25 (d,  $J$  = 7.8 Hz, 2H), 7.02 (d,  $J$  = 8.7 Hz, 1H), 3.85 (s, 3H), 2.36 (s, 3H).  $^{13}\text{C}$  NMR (150 MHz, Chloroform-*d*)  $\delta$  189.8, 157.7, 146.0, 137.9, 134.40, 133.9, 132.0, 130.5, 130.3, 129.6, 129.5, 129.4, 127.1, 119.9, 116.0, 114.1, 104.3, 55.8, 21.7. **HRMS (ESI)** calculated for  $\text{C}_{23}\text{H}_{19}\text{BrNO}_4\text{S}^+$   $[\text{M}+\text{H}]^+$ : 484.0281; found: 484.0282.

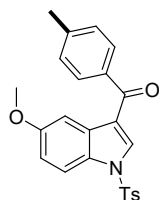

**(5-methoxy-1-tosyl-1*H*-indol-3-yl)(p-tolyl)methanone(3ae)**

Yellow solid, 65 % yield. 82 mg  $^1\text{H}$  NMR (600 MHz, Chloroform-*d*)  $\delta$  7.97 (s, 1H), 7.86 (d,  $J$  = 9.3 Hz, 1H), 7.77 (dd,  $J$  = 15.0, 6.6 Hz, 5H), 7.34 (d,  $J$  = 7.8 Hz, 2H), 7.28 – 7.22 (m, 2H), 7.01 (dd,  $J$  = 9.0, 2.4 Hz, 1H), 3.85 (s, 3H), 2.47 (s, 3H), 2.35 (s, 3H).  $^{13}\text{C}$  NMR (150 MHz, Chloroform-*d*)  $\delta$  190.8, 157.6, 145.9, 143.2, 136.5, 134.5, 133.8, 130.2, 129.8, 129.5, 129.4, 129.2, 127.1, 120.3, 115.8, 114.1, 104.3, 55.7, 21.7, 21.6. **HRMS (ESI)** calculated for  $\text{C}_{24}\text{H}_{22}\text{NO}_4\text{S}^+$   $[\text{M}+\text{H}]^+$ : 420.1269; found: 420.1266.

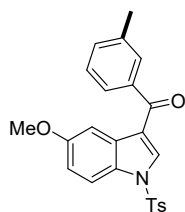

**(5-methoxy-1-tosyl-1*H*-indol-3-yl)(m-tolyl)methanone(3af)**

Yellow solid, 60 % yield. 75 mg  $^1\text{H}$  NMR (600 MHz, Chloroform-*d*)  $\delta$  7.97 (d,  $J$  = 0.9 Hz, 1H), 7.87 (d,  $J$  = 9.3 Hz, 1H), 7.80 (d,  $J$  = 2.7 Hz, 1H), 7.77 (d,  $J$  = 8.1 Hz, 2H), 7.64 (d,  $J$  = 13.2 Hz, 3H), 7.42 (d,  $J$  = 7.5 Hz, 2H), 7.24 (s, 1H), 7.01 (dd,  $J$  = 9.0, 2.4 Hz, 1H), 3.85 (s, 3H), 2.46 (s, 3H), 2.35 (s, 3H).  $^{13}\text{C}$  NMR (150 MHz, Chloroform-*d*)  $\delta$  191.3, 157.6, 145.9, 139.3, 138.6, 134.5, 134.1, 133.2, 130.2, 129.7, 129.5, 129.5, 128.5, 127.1, 126.3, 120.4, 115.8, 114.1, 104.4, 55.7, 21.6, 21.5. **HRMS (ESI)** calculated for  $\text{C}_{24}\text{H}_{22}\text{NO}_4\text{S}^+$   $[\text{M}+\text{H}]^+$ : 420.1269; found: 420.1272.

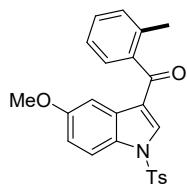

**(5-methoxy-1-tosyl-1*H*-indol-3-yl)(o-tolyl)methanone(3ag)**

Yellow solid, 55 % yield. 69 mg  $^1\text{H}$  NMR (600 MHz, Chloroform-*d*)  $\delta$  7.84 (d,  $J$  = 9.3 Hz, 2H), 7.77 – 7.75 (m, 3H), 7.42 (d,  $J$  = 7.5 Hz, 2H), 7.35 – 7.27 (m, 3H), 7.25 (s, 1H), 7.01 (dd,  $J$  = 9.0, 2.7 Hz, 1H), 3.86 (s, 3H), 2.39 (s, 3H), 2.36 (s, 3H).  $^{13}\text{C}$  NMR (150 MHz, Chloroform-*d*)  $\delta$  193.4, 157.7, 145.9, 139.4, 136.5, 135.1, 134.5, 131.3, 130.4, 130.2, 129.6, 129.1, 128.1, 127.1, 125.5, 121.6, 115.9, 114.1, 104.4, 55.8, 21.7, 19.8. **HRMS (ESI)** calculated for  $\text{C}_{24}\text{H}_{22}\text{NO}_4\text{S}^+$   $[\text{M}+\text{H}]^+$ : 420.1269; found: 420.1266.

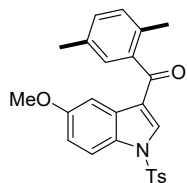

**(2,5-dimethylphenyl)(5-methoxy-1-tosyl-1*H*-indol-3-yl) methanone(3ah)**

Yellow solid, 62 % yield. 80 mg  $^1\text{H}$  NMR (600 MHz, Chloroform-*d*)  $\delta$  7.86 – 7.82 (m, 2H), 7.77 – 7.75 (m, 3H), 7.26 (d,  $J$  = 7.8 Hz, 2H), 7.23 (d,  $J$  = 7.8 Hz, 1H), 7.20 (d,  $J$  = 8.1 Hz, 2H), 7.01 (dd,  $J$  = 9.0, 2.7 Hz, 1H), 3.86 (s, 3H), 2.38 (s, 3H), 2.36 (s, 3H), 2.33 (s, 3H).  $^{13}\text{C}$  NMR (150 MHz, Chloroform-*d*)  $\delta$  193.7, 157.7, 145.9, 139.4, 135.1, 134.9, 134.5, 133.2, 131.1, 131.1, 130.2, 129.7, 129.1, 128.7, 127.1, 121.7, 115.8, 114.1, 104.4, 55.8, 21.7, 21.0, 19.3. **HRMS (ESI)** calculated for  $\text{C}_{25}\text{H}_{24}\text{NO}_4\text{S}^+$   $[\text{M}+\text{H}]^+$ : 434.1426; found: 434.1423.

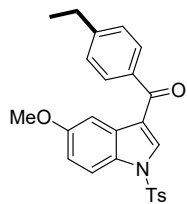

**(4-ethylphenyl)(5-methoxy-1-tosyl-1*H*-indol-3-yl)methanone(3ai)**

Yellow solid, 64 % yield. 83 mg  $^1\text{H}$  NMR (600 MHz, Chloroform-*d*)  $\delta$  7.98 (s, 1H), 7.87 (d,  $J$  = 9.3 Hz, 1H), 7.80 (d,  $J$  = 8.1 Hz, 3H), 7.77 (d,  $J$  = 8.7 Hz, 2H), 7.37 (d,  $J$  = 7.8 Hz, 2H), 7.24 (d,  $J$  = 8.1 Hz, 2H), 7.01 (dd,  $J$  = 9.0, 2.7 Hz, 1H), 3.86 (s, 3H), 2.78 (t,  $J$  = 7.8 Hz, 2H), 2.35 (s, 3H), 1.32 (s, 3H).  $^{13}\text{C}$  NMR (150 MHz, Chloroform-*d*)  $\delta$  190.8, 157.6, 149.4, 145.8, 136.7, 134.5, 133.8, 130.2, 129.8, 129.5, 129.3, 128.2, 127.1, 120.3, 115.8, 114.1, 104.3, 55.7, 28.9, 21.6, 15.4. **HRMS (ESI)** calculated for  $\text{C}_{25}\text{H}_{24}\text{NO}_4\text{S}^+$   $[\text{M}+\text{H}]^+$ : 434.1426; found: 434.1428.



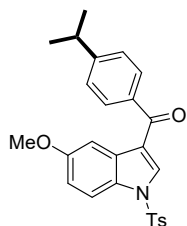

**(4-isopropylphenyl)(5-methoxy-1-tosyl-1H-indol-3-yl)methanone(3aj)**

Yellow solid, 60 % yield. 80 mg  $^1\text{H NMR}$  (600 MHz, Chloroform-*d*)  $\delta$  8.00 (d,  $J$  = 6.0 Hz, 1H), 7.86 (d,  $J$  = 9.3 Hz, 1H), 7.81 (dt,  $J$  = 7.8, 3.9 Hz, 3H), 7.77 (d,  $J$  = 8.7 Hz, 2H), 7.56 (d,  $J$  = 8.4 Hz, 1H), 7.40 (d,  $J$  = 8.1 Hz, 1H), 7.25 (d,  $J$  = 8.1 Hz, 2H), 7.01 (dd,  $J$  = 9.0, 2.7 Hz, 1H), 3.86 (s, 3H), 3.03 (p,  $J$  = 6.9 Hz, 1H), 2.35 (s, 3H), 1.40 (s, 3H), 1.33 (d,  $J$  = 6.9 Hz, 3H).  $^{13}\text{C NMR}$  (150 MHz, Chloroform-*d*)  $\delta$  190.7, 157.6, 156.1, 153.9, 145.8, 136.9, 134.5, 133.8, 130.2, 129.3, 127.1, 126.8, 125.7, 120.3, 115.8, 114.1, 104.3, 104.3, 55.7, 31.2, 23.8, 21.6. **HRMS (ESI)** calculated for  $\text{C}_{26}\text{H}_{26}\text{NO}_4\text{S}^+ [\text{M}+\text{H}]^+$ : 448.1582; found: 448.1585.

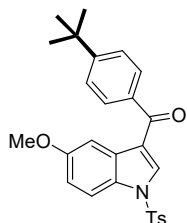

**(4-(tert-butyl)phenyl)(5-methoxy-1-tosyl-1H-indol-3-yl)methanone (3ak)**

Yellow solid, 61 % yield. 84 mg  $^1\text{H NMR}$  (600 MHz, Chloroform-*d*)  $\delta$  7.93 (s, 1H), 7.79 (d,  $J$  = 9.3 Hz, 1H), 7.74 (d,  $J$  = 8.1 Hz, 3H), 7.69 (d,  $J$  = 8.1 Hz, 2H), 7.48 (d,  $J$  = 8.1 Hz, 2H), 7.17 (d,  $J$  = 8.1 Hz, 2H), 6.93 (dd,  $J$  = 9.0, 2.7 Hz, 1H), 3.78 (s, 3H), 2.27 (s, 3H), 1.32 (s, 9H).  $^{13}\text{C NMR}$  (150 MHz, Chloroform-*d*)  $\delta$  189.7, 156.6, 155.1, 144.8, 135.4, 133.5, 132.8, 129.2, 128.7, 128.6, 128.5, 127.9, 126.8, 126.0, 124.6, 119.3, 114.8, 113.0, 103.3, 54.7, 34.1, 30.2, 20.6. **HRMS (ESI)** calculated for  $\text{C}_{27}\text{H}_{28}\text{NO}_4\text{S}^+ [\text{M}+\text{H}]^+$ : 462.1739; found: 462.1742.

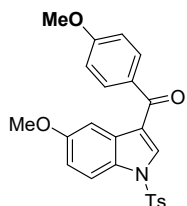

**(5-methoxy-1-tosyl-1H-indol-3-yl)(4-methoxyphenyl)methanone (3al)**

Yellow solid, 72 % yield. 94 mg  $^1\text{H NMR}$  (600 MHz, Chloroform-*d*)  $\delta$  7.96 (s, 1H), 7.89 (d,  $J$  = 1.8 Hz, 1H), 7.88 – 7.86 (m, 2H), 7.77 – 7.73 (m, 3H), 7.24 (d,  $J$  = 8.1 Hz, 2H), 7.04 – 6.99 (m, 3H), 3.92 (s, 3H), 3.85 (s, 3H), 2.35 (s, 3H).  $^{13}\text{C NMR}$  (150 MHz, Chloroform-*d*)  $\delta$  189.6, 163.2, 157.5, 145.8, 134.53, 133.1, 131.7, 131.4, 130.2, 129.9, 129.5, 127.0, 120.4, 115.8, 114.1, 113.9, 104.2, 55.7, 55.6, 21.6. **HRMS (ESI)** calculated for  $\text{C}_{24}\text{H}_{22}\text{NO}_4\text{S}^+ [\text{M}+\text{H}]^+$ : 436.1218; found: 436.1217.

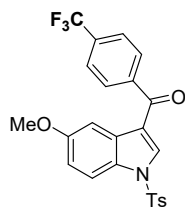

**(5-methoxy-1-tosyl-1*H*-indol-3-yl)(4-(trifluoromethyl)phenyl) methanone (3am)**

Yellow solid, 69 % yield. 98 mg  $^1\text{H}$  NMR (600 MHz, Chloroform-*d*)  $\delta$  7.92 (d,  $J$  = 6.3 Hz, 3H), 7.86 (d,  $J$  = 9.3 Hz, 1H), 7.80 (dd,  $J$  = 5.4, 2.7 Hz, 3H), 7.80 – 7.74 (m, 2H), 7.26 (d,  $J$  = 8.1 Hz, 2H), 7.02 (dd,  $J$  = 9.0, 2.7 Hz, 1H), 3.84 (s, 3H), 2.34 (s, 3H).  $^{13}\text{C}$  NMR (150 MHz, Chloroform-*d*)  $\delta$  189.9, 157.8, 146.1, 142.3, 134.4, 134.3 (d,  $J$  = 4.5 Hz), 130.3, 129.5, 129.3, 129.1, 127.1, 125.8 (q,  $J$  = 3.6 Hz), 124.6, 122.8, 119.8, 116.1, 114.1, 104.4, 55.8, 21.7.  $^{19}\text{F}$  NMR (470 MHz, Chloroform-*d*)  $\delta$  -62.94. HRMS (ESI) calculated for  $\text{C}_{24}\text{H}_{19}\text{F}_3\text{NO}_4\text{S}^+$   $[\text{M}+\text{H}]^+$ : 474.0987; found: 474.0985.

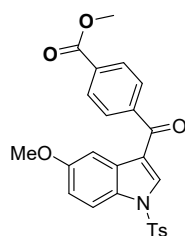

**methyl 4-(5-methoxy-1-tosyl-1*H*-indole-3-carbonyl)benzoate (3an)**

Yellow solid, 78 % yield. 108 mg  $^1\text{H}$  NMR (600 MHz, Chloroform-*d*)  $\delta$  8.21 (d,  $J$  = 8.4 Hz, 2H), 7.94 (s, 1H), 7.88 (t,  $J$  = 8.7 Hz, 3H), 7.81 (d,  $J$  = 2.7 Hz, 1H), 7.78 (d,  $J$  = 8.1 Hz, 2H), 7.27 (d,  $J$  = 6.9 Hz, 2H), 7.03 (dd,  $J$  = 9.0, 2.7 Hz, 1H), 3.99 (s, 3H), 3.87 (s, 3H), 2.37 (s, 3H).  $^{13}\text{C}$  NMR (150 MHz, Chloroform-*d*)  $\delta$  190.4, 166.3, 157.8, 146.1, 142.8, 134.4, 134.4, 133.2, 130.3, 129.9, 129.5, 129.3, 128.8, 127.1, 119.9, 116.1, 114.1, 104.4, 55.8, 52.5, 21.7. HRMS (ESI) calculated for  $\text{C}_{25}\text{H}_{22}\text{NO}_6\text{S}^+$   $[\text{M}+\text{H}]^+$ : 464.1168; found: 464.1164.

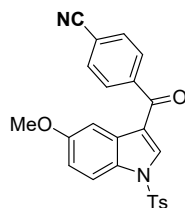

**4-(5-methoxy-1-tosyl-1*H*-indole-3-carbonyl)benzonitrile (3ao)**

Yellow solid, 74 % yield. 95 mg  $^1\text{H}$  NMR (600 MHz, Chloroform-*d*)  $\delta$  7.94 – 7.92 (m, 2H), 7.91 (s, 1H), 7.87 – 7.83 (m, 3H), 7.80 – 7.77 (m, 3H), 7.27 (d,  $J$  = 8.4 Hz, 2H), 7.04 (dd,  $J$  = 9.0, 2.7 Hz, 1H), 3.86 (s, 3H), 2.37 (s, 3H).  $^{13}\text{C}$  NMR (150 MHz, Chloroform-*d*)  $\delta$  189.3, 157.9, 146.2, 142.8, 134.3, 134.2, 132.6, 130.3, 129.5, 129.3, 129.2, 127.2, 119.5, 118.0, 116.2, 115.6, 114.1, 104.4, 55.8, 21.7. HRMS (ESI) calculated for  $\text{C}_{24}\text{H}_{19}\text{N}_2\text{O}_4\text{S}^+$   $[\text{M}+\text{H}]^+$ : 431.1065; found: 431.1069.

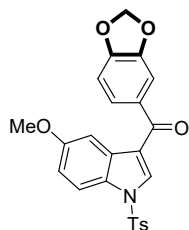

**benzo[d][1,3]dioxol-5-yl(5-methoxy-1-tosyl-1H-indol-3-yl)methanone (3ap)**

Yellow solid, 60 % yield. 81 mg  $^1\text{H NMR}$  (600 MHz, Chloroform-*d*)  $\delta$  7.89 (s, 1H), 7.79 (d,  $J$  = 9.3 Hz, 1H), 7.70 (d,  $J$  = 8.4 Hz, 2H), 7.65 (d,  $J$  = 2.7 Hz, 1H), 7.40 (d,  $J$  = 9.6 Hz, 1H), 7.18 (d,  $J$  = 10.2 Hz, 3H), 6.93 (dd,  $J$  = 9.0, 2.7 Hz, 1H), 6.86 (d,  $J$  = 8.1 Hz, 1H), 6.03 (s, 2H), 3.78 (s, 3H), 2.29 (s, 3H).  $^{13}\text{C NMR}$  (150 MHz, Chloroform-*d*)  $\delta$  188.1, 156.5, 150.5, 147.2, 144.8, 133.5, 132.5, 132.1, 129.2, 128.7, 128.5, 126.0, 124.2, 119.2, 114.8, 113.1, 108.0, 107.0, 103.1, 100.9, 54.7, 20.6. **HRMS (ESI)** calculated for  $\text{C}_{24}\text{H}_{20}\text{NO}_6\text{S}^+$   $[\text{M}+\text{H}]^+$ : 450.1011; found: 450.1009.

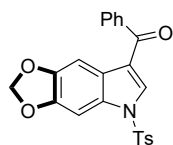

**phenyl(5-tosyl-5H-[1,3]dioxolo[4,5-f]indol-7-yl)methanone (3ba)**

Yellow solid, 50 % yield. 63 mg  $^1\text{H NMR}$  (600 MHz, Chloroform-*d*)  $\delta$  7.80 (s, 1H), 7.76 (d,  $J$  = 6.9 Hz, 2H), 7.68 (d,  $J$  = 8.4 Hz, 2H), 7.64 (s, 1H), 7.57 – 7.51 (m, 2H), 7.45 (t,  $J$  = 7.5 Hz, 2H), 7.19 (d,  $J$  = 2.4 Hz, 1H), 7.15 – 7.12 (m, 1H), 5.94 (s, 2H), 2.30 (s, 3H).  $^{13}\text{C NMR}$  (150 MHz, Chloroform-*d*)  $\delta$  189.9, 146.3, 144.9, 138.1, 133.4, 131.3, 129.2, 128.6, 127.9, 127.6, 126.3, 126.1, 121.9, 119.5, 107.8, 104.4, 100.6, 93.5, 20.6. **HRMS (ESI)** calculated for  $\text{C}_{23}\text{H}_{18}\text{NO}_5\text{S}^+$   $[\text{M}+\text{H}]^+$ : 420.0905; found: 420.0909.

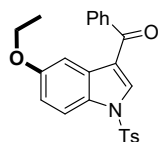

**(5-ethoxy-1-tosyl-1H-indol-3-yl)(phenyl)methanone (3ca)**

Yellow solid, 77 % yield. 97 mg  $^1\text{H NMR}$  (600 MHz, Chloroform-*d*)  $\delta$  7.97 (s, 1H), 7.86 (dd,  $J$  = 8.7, 4.5 Hz, 3H), 7.81 – 7.74 (m, 3H), 7.62 (t,  $J$  = 7.5 Hz, 1H), 7.54 (t,  $J$  = 7.8 Hz, 2H), 7.24 (d,  $J$  = 8.1 Hz, 2H), 7.01 (dd,  $J$  = 9.0, 2.7 Hz, 1H), 4.09 (q,  $J$  = 6.9 Hz, 2H), 2.35 (s, 3H), 1.42 (t,  $J$  = 6.9 Hz, 3H).  $^{13}\text{C NMR}$  (150 MHz, Chloroform-*d*)  $\delta$  191.0, 157.0, 145.9, 139.3, 134.5, 134.1, 132.3, 130.2, 129.6, 129.5, 129.0, 128.7, 127.1, 120.2, 116.3, 114.1, 105.1, 63.9, 21.7, 14.8. **HRMS (ESI)** calculated for  $\text{C}_{24}\text{H}_{22}\text{NO}_4\text{S}^+$   $[\text{M}+\text{H}]^+$ : 420.1269; found: 420.1272.

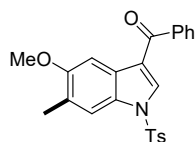

**(5-methoxy-6-methyl-1-tosyl-1*H*-indol-3-yl)(phenyl)methanone (3ea)**

Yellow solid, 70 % yield. 88 mg  $^1\text{H}$  NMR (600 MHz, Chloroform-*d*)  $\delta$  7.83 (s, 1H), 7.77 (dt,  $J$  = 6.9, 1.4 Hz, 2H), 7.70 – 7.66 (m, 3H), 7.65 (s, 1H), 7.53 (d,  $J$  = 7.5 Hz, 1H), 7.45 (t,  $J$  = 7.5 Hz, 2H), 7.17 (d,  $J$  = 8.1 Hz, 2H), 3.80 (s, 3H), 2.27 (s, 6H).  $^{13}\text{C}$  NMR (150 MHz, Chloroform-*d*)  $\delta$  191.2, 156.2, 145.8, 139.3, 134.7, 133.1, 132.3, 130.2, 129.2, 129.0, 128.7, 127.4, 127.0, 126.7, 120.3, 114.5, 102.4, 55.7, 21.7, 17.5. **HRMS (ESI)** calculated for  $\text{C}_{24}\text{H}_{22}\text{NO}_4\text{S}^+$   $[\text{M}+\text{H}]^+$ : 420.1269; found: 420.1265.

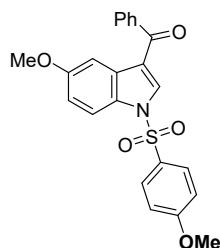

**(5-methoxy-1-((4-methoxyphenyl)sulfonyl)-1*H*-indol-3-yl)(phenyl) methanone (3ia)**

Yellow solid, 62 % yield. 78 mg  $^1\text{H}$  NMR (600 MHz, Chloroform-*d*)  $\delta$  7.89 (s, 1H), 7.77 – 7.74 (m, 3H), 7.73 – 7.70 (m, 3H), 7.51 – 7.49 (m, 1H), 7.42 (t,  $J$  = 7.5 Hz, 2H), 6.91 (dd,  $J$  = 9.0, 2.7 Hz, 1H), 6.78 (d,  $J$  = 9.0 Hz, 2H), 3.75 (s, 3H), 3.66 (s, 3H).  $^{13}\text{C}$  NMR (150 MHz, Chloroform-*d*)  $\delta$  191.1, 164.4, 157.6, 139.3, 134.2, 132.3, 129.7, 129.5, 129.4, 128.9, 128.7, 120.0, 115.8, 114.8, 114.1, 114.1, 104.4, 55.8, 55.7. **HRMS (ESI)** calculated for  $\text{C}_{23}\text{H}_{20}\text{NO}_5\text{S}^+$   $[\text{M}+\text{H}]^+$ : 422.1062; found: 422.1065.

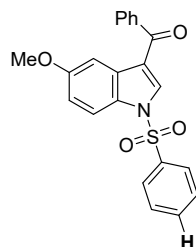

**(6-methoxy-1-(phenylsulfonyl)-1*H*-indol-3-yl)(phenyl)methanone (3ja)**

Yellow solid, 57 % yield. 67 mg  $^1\text{H}$  NMR (600 MHz, Chloroform-*d*)  $\delta$  7.79 (s, 1H), 7.70 – 7.65 (m, 5H), 7.61 (d,  $J$  = 2.7 Hz, 1H), 7.44 – 7.42 (m, 1H), 7.40 – 7.32 (m, 4H), 7.27 (s, 1H), 6.83 (dd,  $J$  = 9.0, 2.7 Hz, 1H), 3.66 (s, 3H).  $^{13}\text{C}$  NMR (150 MHz, Chloroform-*d*)  $\delta$  189.9, 156.7, 138.1, 136.4, 133.5, 132.9, 131.4, 128.6, 128.6, 128.5, 127.9, 127.7, 125.9, 119.3, 114.9, 113.0, 103.3, 54.7. **HRMS (ESI)** calculated for  $\text{C}_{22}\text{H}_{18}\text{NO}_4\text{S}^+$   $[\text{M}+\text{H}]^+$ : 392.0956; found: 392.0958.

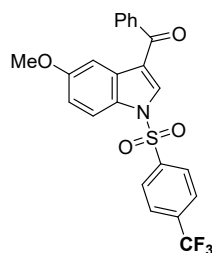

**(5-methoxy-1-((4-(trifluoromethyl)phenyl)sulfonyl)-1*H*-indol-3-yl)(phenyl) methanone (3ka)**

**methanone (3ka)**

Yellow solid, 40 % yield. 55 mg  $^1\text{H}$  NMR (600 MHz, Chloroform-*d*)  $\delta$  8.04 (d,  $J$  = 8.4 Hz, 2H), 7.98 (s, 1H), 7.92 – 7.86 (m, 3H), 7.80 (d,  $J$  = 2.7 Hz, 1H), 7.74 (d,  $J$  = 8.4 Hz, 2H), 7.68 – 7.62 (m, 1H), 7.56 (d,  $J$  = 7.8 Hz, 2H), 7.08 (dd,  $J$  = 9.0, 2.7 Hz, 1H), 3.90 (s, 3H).  $^{13}\text{C}$  NMR (150 MHz, Chloroform-*d*)  $\delta$  190.8, 157.9, 140.8, 138.9, 133.5, 132.6, 129.8, 129.5, 129.0, 128.8, 127.6, 126.8 (q,  $J$  = 3.6 Hz), 121.1, 116.3, 113.9, 104.7, 77.3, 77.1, 76.8, 55.8.  $^{19}\text{F}$  NMR (470 MHz,  $\text{CDCl}_3$ )  $\delta$  -63.44. **HRMS (ESI)** calculated for  $\text{C}_{23}\text{H}_{17}\text{F}_3\text{NO}_4\text{S}^+$   $[\text{M}+\text{H}]^+$ : 460.0830; found: 460.0828.

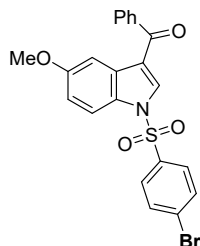

**(1-((4-bromophenyl)sulfonyl)-5-methoxy-1*H*-indol-3-yl)(phenyl) methanone(3la)**

Yellow solid, 50 % yield. 70 mg  $^1\text{H}$  NMR (600 MHz, Chloroform-*d*)  $\delta$  7.94 (s, 1H), 7.87 – 7.83 (m, 3H), 7.80 (d,  $J$  = 2.7 Hz, 1H), 7.74 (d,  $J$  = 8.7 Hz, 2H), 7.60 (d,  $J$  = 8.7 Hz, 3H), 7.55 (t,  $J$  = 7.8 Hz, 2H), 7.03 (dd,  $J$  = 9.0, 2.7 Hz, 1H), 3.87 (s, 3H).  $^{13}\text{C}$  NMR (150 MHz, Chloroform-*d*)  $\delta$  190.9, 157.9, 139.1, 136.4, 133.7, 132.9, 132.5, 130.1, 129.8, 129.4, 129.0, 128.7, 128.4, 120.8, 116.1, 113.9, 104.6, 55.8. **HRMS (ESI)** calculated for  $\text{C}_{22}\text{H}_{17}\text{BrNO}_4\text{S}^+$   $[\text{M}+\text{H}]^+$ : 470.0061; found: 470.0065.

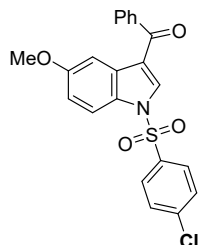

**(1-((4-chlorophenyl)sulfonyl)-5-methoxy-1*H*-indol-3-yl)(phenyl) methanone(3ma)**

Yellow solid, 54 % yield. 69 mg  $^1\text{H}$  NMR (600 MHz, Chloroform-*d*)  $\delta$  7.86 (s, 1H), 7.78 – 7.75 (m, 3H), 7.73 (d,  $J$  = 9.0 Hz, 3H), 7.54 (t,  $J$  = 7.5 Hz, 1H), 7.45 (t,  $J$  = 7.5 Hz, 2H), 7.33 (d,  $J$  = 8.7 Hz, 2H), 6.94 (dd,  $J$  = 9.0, 2.7 Hz, 1H), 3.77 (s, 3H).  $^{13}\text{C}$  NMR (150 MHz, Chloroform-*d*)  $\delta$  189.8, 156.8, 140.4, 138.0, 134.7, 132.6, 131.4, 128.9, 128.7, 128.3, 127.9, 127.7, 127.3, 119.6, 115.0, 112.9, 103.5, 54.7. **HRMS (ESI)** calculated for  $\text{C}_{22}\text{H}_{17}\text{ClNO}_4\text{S}^+$   $[\text{M}+\text{H}]^+$ : 426.0567; found: 426.0565.

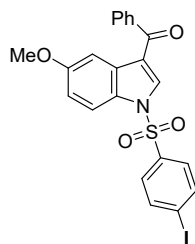

**(1-((4-iodophenyl)sulfonyl)-5-methoxy-1H-indol-3-yl)(phenyl) methanone(3na)**

Yellow solid, 58 % yield. 90 mg  $^1\text{H NMR}$  (600 MHz, Chloroform-*d*)  $\delta$  7.85 (s, 1H), 7.75 (t,  $J$  = 8.4 Hz, 3H), 7.71 (d,  $J$  = 8.7 Hz, 3H), 7.54 (t,  $J$  = 7.5 Hz, 1H), 7.49 – 7.44 (m, 4H), 6.93 (dd,  $J$  = 9.0, 2.7 Hz, 1H), 3.77 (s, 3H).  $^{13}\text{C NMR}$  (150 MHz, Chloroform-*d*)  $\delta$  190.9, 157.839, 139.1, 138.9, 136.9, 133.7, 132.5, 129.8, 129.4, 129.0, 128.8, 128.1, 120.7, 116.1, 113.9, 104.6, 102.8, 55.8.

**HRMS (ESI)** calculated for  $\text{C}_{22}\text{H}_{17}\text{INO}_4\text{S}^+$   $[\text{M}+\text{H}]^+$ : 517.9923; found: 517.9925.

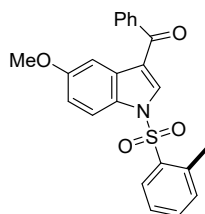

**(5-methoxy-1-(o-tolylsulfonyl)-1H-indol-3-yl)(phenyl) methanone(3oa)**

Yellow solid, 66 % yield. 80 mg  $^1\text{H NMR}$  (600 MHz, Chloroform-*d*)  $\delta$  8.00 (s, 1H), 7.88 – 7.84 (m, 4H), 7.81 (d,  $J$  = 2.7 Hz, 1H), 7.69 (d,  $J$  = 1.5 Hz, 2H), 7.61 (d,  $J$  = 5.4 Hz, 1H), 7.53 (s, 1H), 7.51 (d,  $J$  = 3.9 Hz, 1H), 7.35 (s, 1H), 7.02 (dd,  $J$  = 9.0, 2.7 Hz, 1H), 3.84 (s, 3H), 2.34 (s, 3H).  $^{13}\text{C NMR}$  (150 MHz, Chloroform-*d*)  $\delta$  191.0, 157.7, 140.1, 139.2, 137.3, 136.5, 135.5, 134.1, 133.3, 132.4, 130.1, 129.0, 128.7, 127.2, 124.3, 120.2, 115.9, 114.1, 104.4, 55.7, 21.4. **HRMS (ESI)**

calculated for  $\text{C}_{23}\text{H}_{19}\text{NO}_4\text{S}^+$   $[\text{M}+\text{H}]^+$ : 406.1113; found: 406.1115.

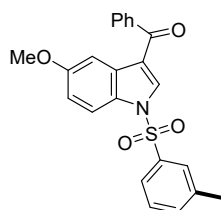

**(6-methoxy-1-(m-tolylsulfonyl)-1H-indol-3-yl)(phenyl)methanone (3pa)**

Yellow solid, 68 % yield. 83 mg  $^1\text{H NMR}$  (600 MHz, Chloroform-*d*)  $\delta$  7.98 (s, 1H), 7.89 – 7.87 (m, 1H), 7.76 (d,  $J$  = 2.4 Hz, 3H), 7.50 (t,  $J$  = 7.2 Hz, 2H), 7.43 (s, 1H), 7.42 (s, 1H), 7.41 (s, 1H), 7.39 (s, 1H), 7.13 (d,  $J$  = 3.6 Hz, 1H), 6.83 (dd,  $J$  = 9.0, 2.7 Hz, 1H), 3.74 (s, 3H), 2.37 (s, 3H).  $^{13}\text{C NMR}$  (150 MHz, Chloroform-*d*)  $\delta$  189.9, 156.5, 138.2, 137.0, 135.1, 133.6, 133.1, 132.2, 131.3, 129.0, 128.4, 127.8, 127.6, 125.9, 125.8, 118.0, 114.7, 112.6, 103.4, 54.6, 19.1. **HRMS (ESI)**

calculated for  $\text{C}_{16}\text{H}_{13}\text{NO}_2^+$   $[\text{M}+\text{H}]^+$ : 406.1113; found: 406.1110.

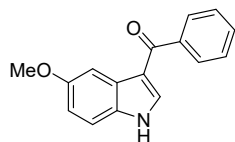

**(5-Methoxy-1H-indol-3-yl)(phenyl)methanone(3c)**

Yellow solid, 23 mg, yield: 90 % <sup>1</sup>H NMR (600 MHz, DMSO-d<sub>6</sub>) δ 11.99 (s, 1H), 7.88 (m, 1H), 7.82 – 7.77 (m, 3H), 7.60 (t, *J* = 7.2 Hz, 1H), 7.54 (t, *J* = 7.5 Hz, 2H), 7.43 (m, 1H), 6.91 (m, 1H), 3.82 (s, 3H). <sup>13</sup>C NMR (150 MHz, DMSO-d<sub>6</sub>) δ 190.3, 155.9, 141.0, 136.3, 131.9, 131.3, 128.7, 128.6, 127.4, 115.2, 113.4, 113.4, 103.5, 55.6. HRMS (ESI) calculated for C<sub>16</sub>H<sub>13</sub>NO<sub>2</sub><sup>+</sup> [M+H]<sup>+</sup>: 252.1025; found: 252.1022.

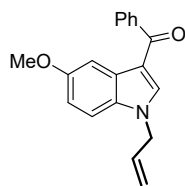

**(1-Allyl-5-methoxy-1H-indol-3-yl)(phenyl)methanone(4a)**

Yellow solid, 25 mg, yield: 86 % <sup>1</sup>H NMR (600 MHz, Chloroform-*d*) δ 7.90 (m, 1H), 7.73 (d, *J* = 7.2 Hz, 2H), 7.45 (d, *J* = 12.9 Hz, 2H), 7.42 – 7.38 (m, 2H), 7.17 (m, 1H), 6.88 (m, 1H), 5.94 – 5.86 (m, 1H), 5.19 (m, 1H), 5.07 (m, 1H), 4.64 (d, *J* = 5.1 Hz, 2H), 3.83 (s, 3H). <sup>13</sup>C NMR (150 MHz, Chloroform-*d*) δ 189.9, 155.6, 139.9, 135.9, 131.0, 130.8, 130.0, 127.6, 127.3, 127.2, 117.5, 114.5, 113.23, 109.9, 102.8, 54.8, 48.6. HRMS (ESI) calculated for C<sub>19</sub>H<sub>17</sub>NO<sub>2</sub>S<sup>+</sup> [M+H]<sup>+</sup>: 292.1338; found: 292.1340.

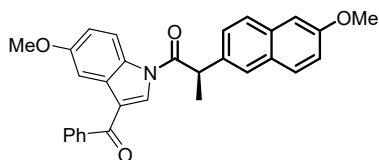

**1-(3-Benzoyl-5-methoxy-1H-indol-1-yl)-2-(6-methoxynaphthalen-2-yl)propan-1-one(4b)**

Yellow solid, 68 mg, yield: 74 % <sup>1</sup>H NMR (600 MHz, Chloroform-*d*) δ 8.48 (m, 1H), 7.86 (s, 1H), 7.78 (m, 1H), 7.75 (m, 1H), 7.67 (m, 1H), 7.61 (s, 1H), 7.49 (t, *J* = 7.5 Hz, 1H), 7.35 (d, *J* = 6.9 Hz, 2H), 7.29 (m, 1H), 7.26 – 7.12 (m, 5H), 7.06 (m, 1H), 4.46 (q, *J* = 6.9 Hz, 1H), 3.92 (s, 3H), 3.87 (s, 3H), 1.68 (d, *J* = 6.6 Hz, 2H). <sup>13</sup>C NMR (150 MHz, Chloroform-*d*) δ 191.1, 172.3, 158.1, 157.8, 139.1, 135.9, 133.9, 133.8, 132.0, 130.9, 129.3, 129.2, 128.8, 128.4, 128.4, 125.8, 125.2, 119.7, 117.4, 115.7, 105.7, 104.1, 55.7, 55.4, 46.6, 20.2. HRMS (ESI) calculated for C<sub>30</sub>H<sub>25</sub>NO<sub>4</sub><sup>+</sup> [M+H]<sup>+</sup>: 464.1862; found: 464.1865.

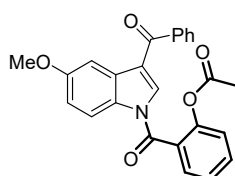

### 2-(3-Benzoyl-5-methoxy-1*H*-indole-1-carbonyl)phenyl acetate(4c)

Yellow solid, 57 mg, yield: 69 % **<sup>1</sup>H NMR** (600 MHz, Chloroform-*d*) δ 8.30 (m, 1H), 7.88 – 7.78 (m, 6H), 7.57 (dt, *J* = 52.8, 7.7 Hz, 5H), 7.05 – 7.02 (m, 1H), 3.89 (s, 3H), 2.64 (s, 3H). **<sup>13</sup>C NMR** (150 MHz, Chloroform-*d*) δ 191.4, 168.5, 157.6, 139.5, 133.08, 132.3, 130.7, 129.23, 128.9, 128.7, 128.5, 120.5, 117.1, 115.7, 104.2, 55.7, 23.8. **HRMS (ESI)** calculated for C<sub>25</sub>H<sub>20</sub>NO<sub>5</sub><sup>+</sup> [M+H]<sup>+</sup>: 414.1341; found: 414.1339.

### 6. NMR Spectra

#### 3aa

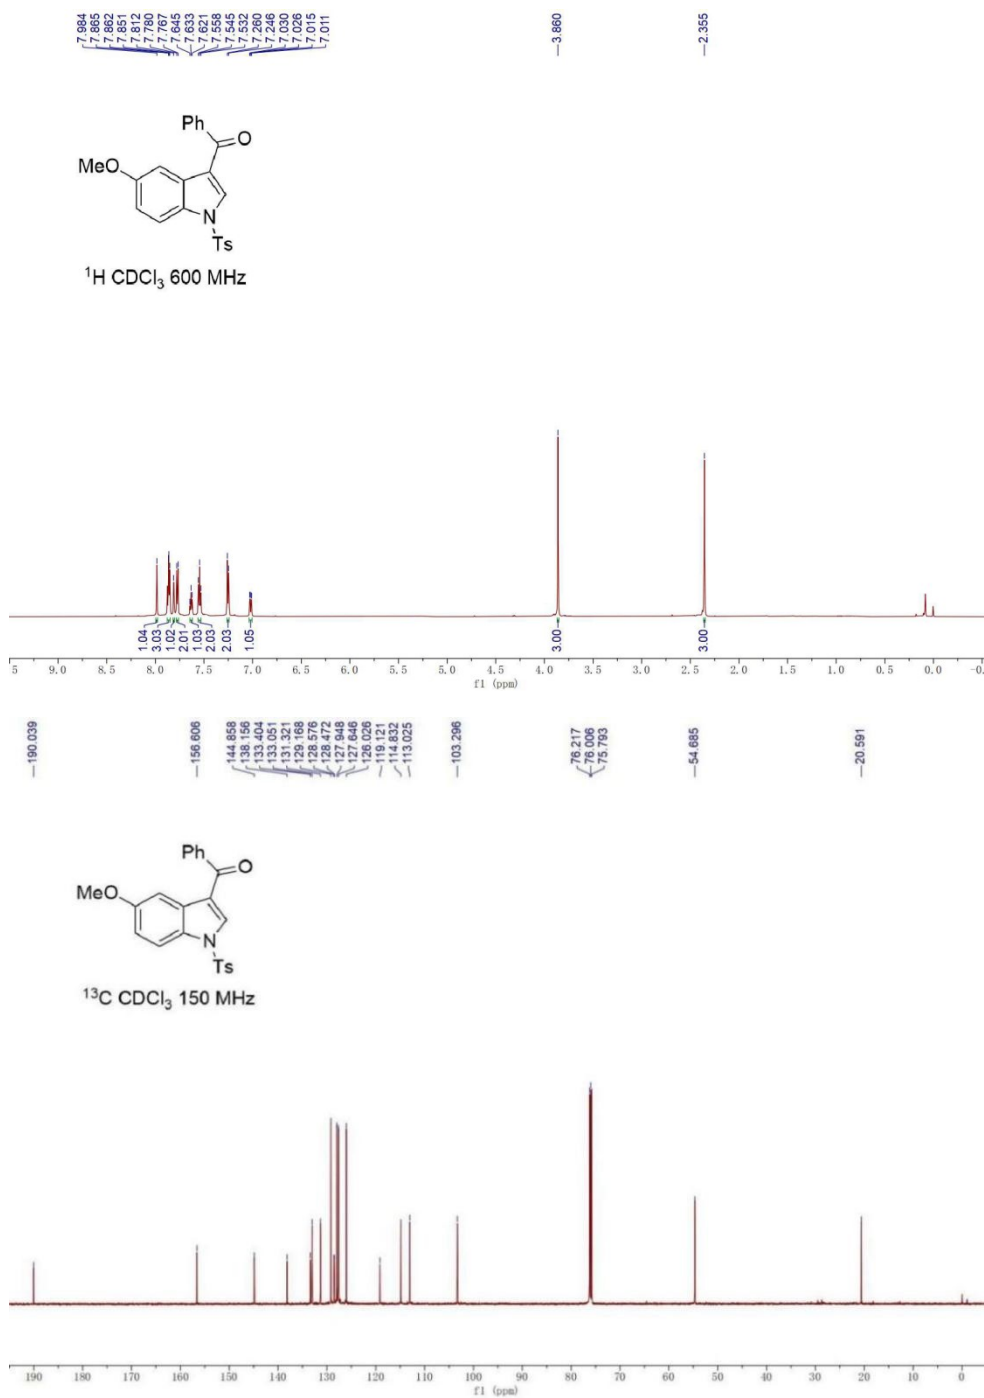



**3ab**

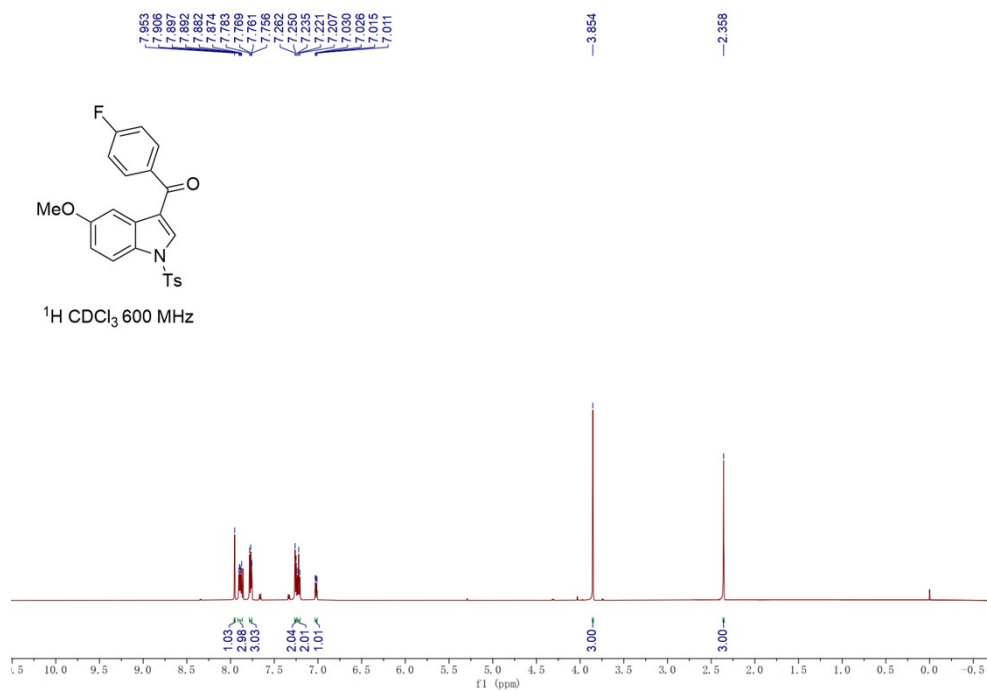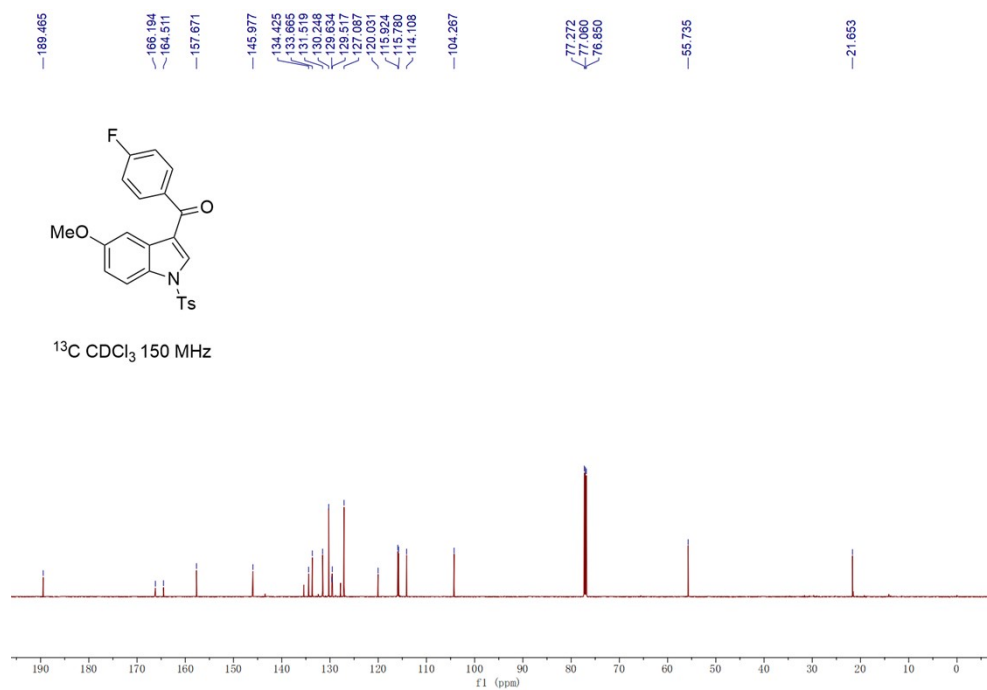

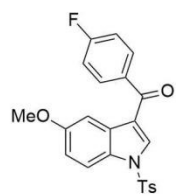

$^{19}\text{F}$  CDCl<sub>3</sub> 470MHz

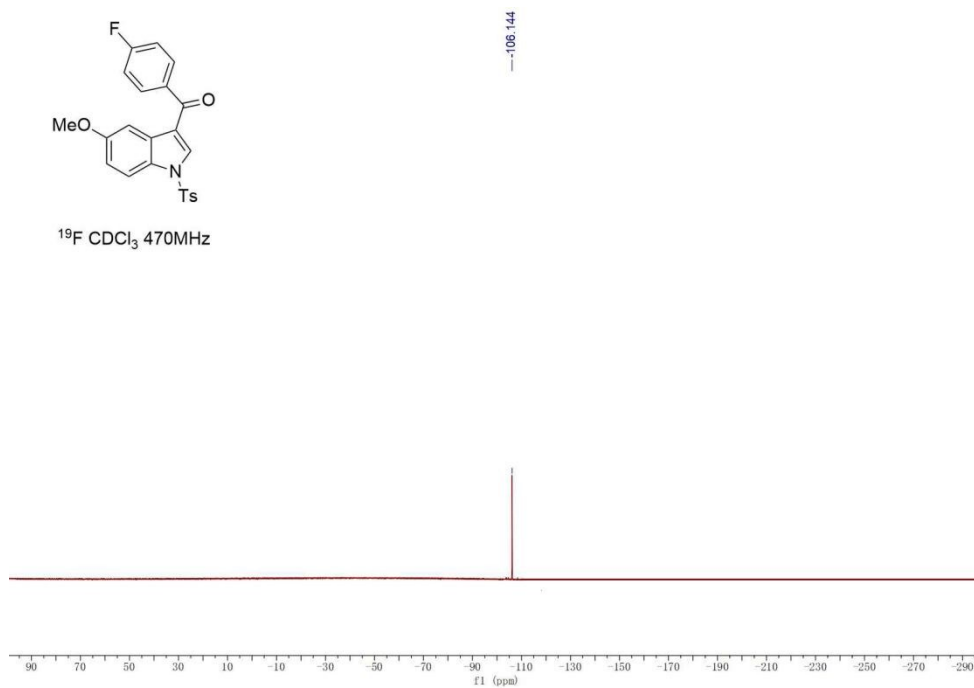

3ac

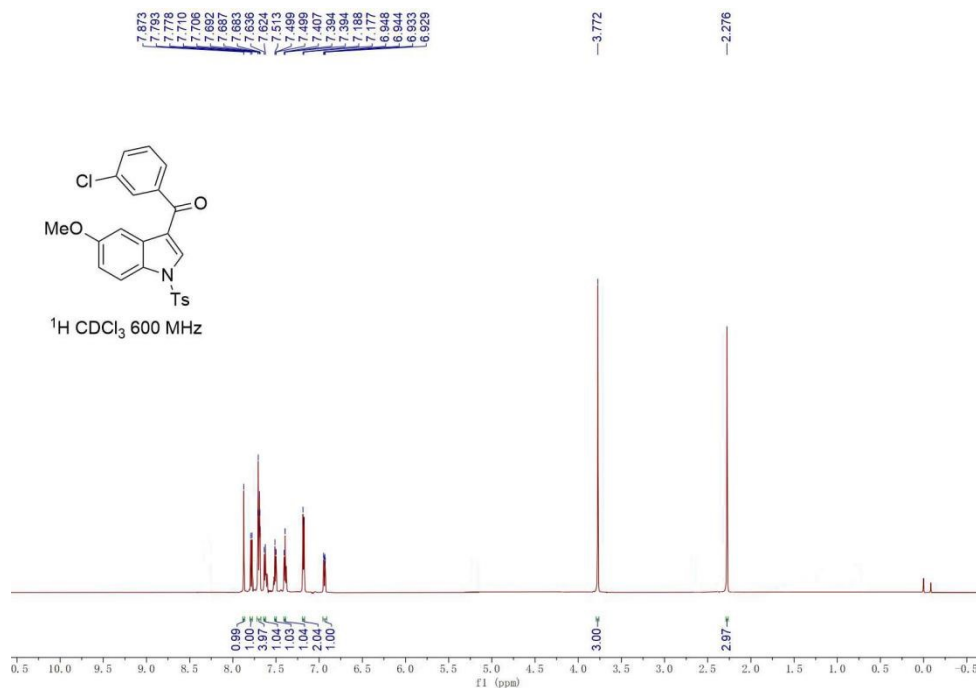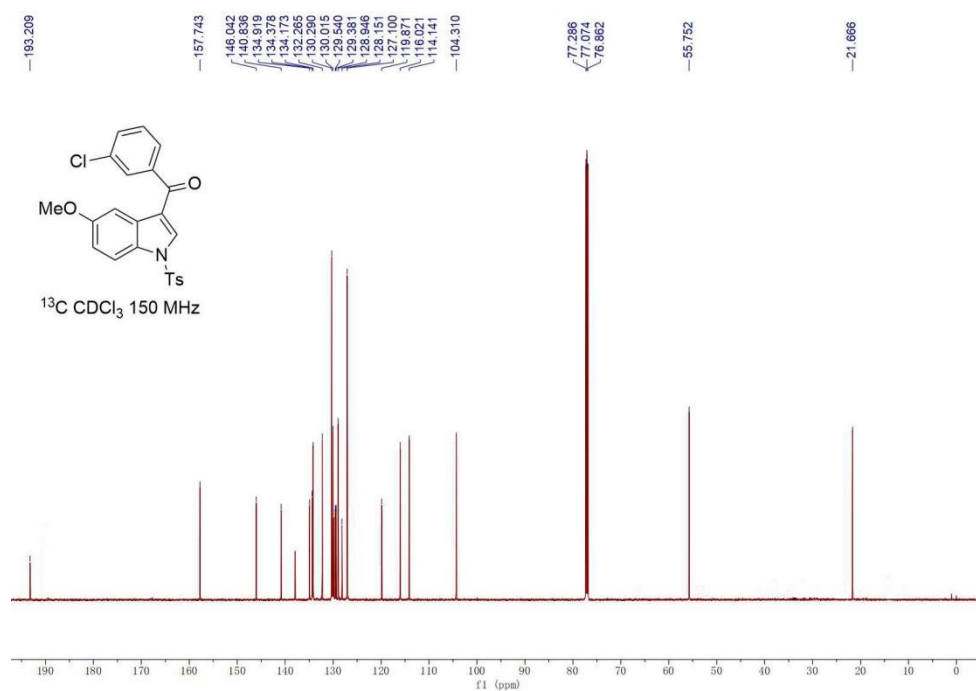

3ad

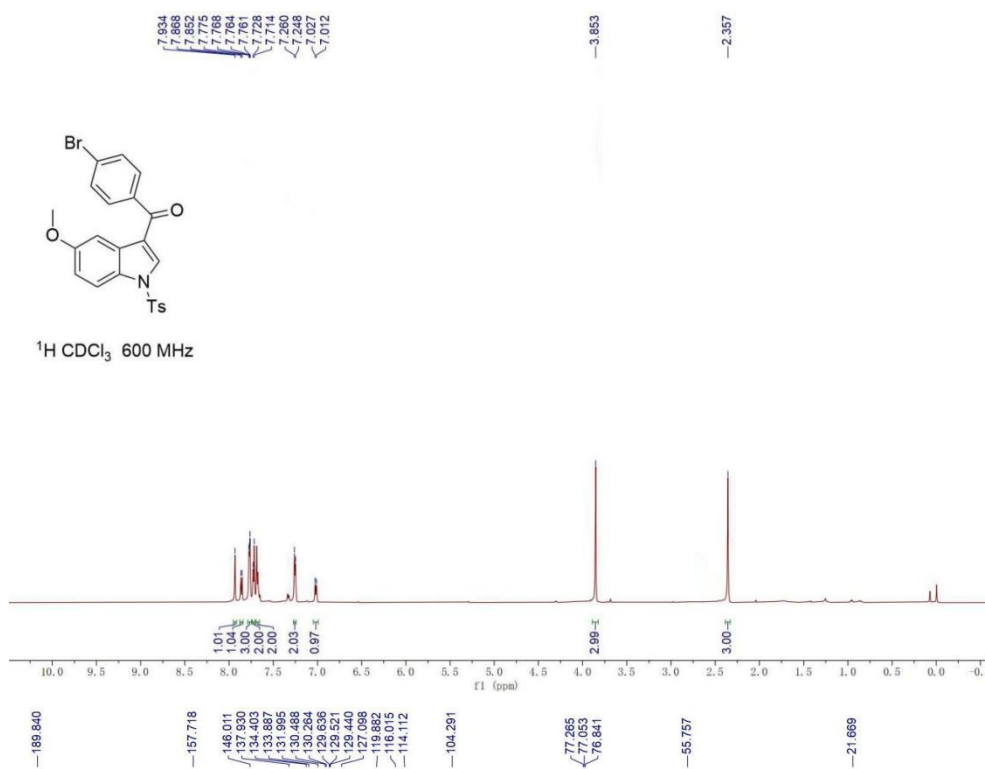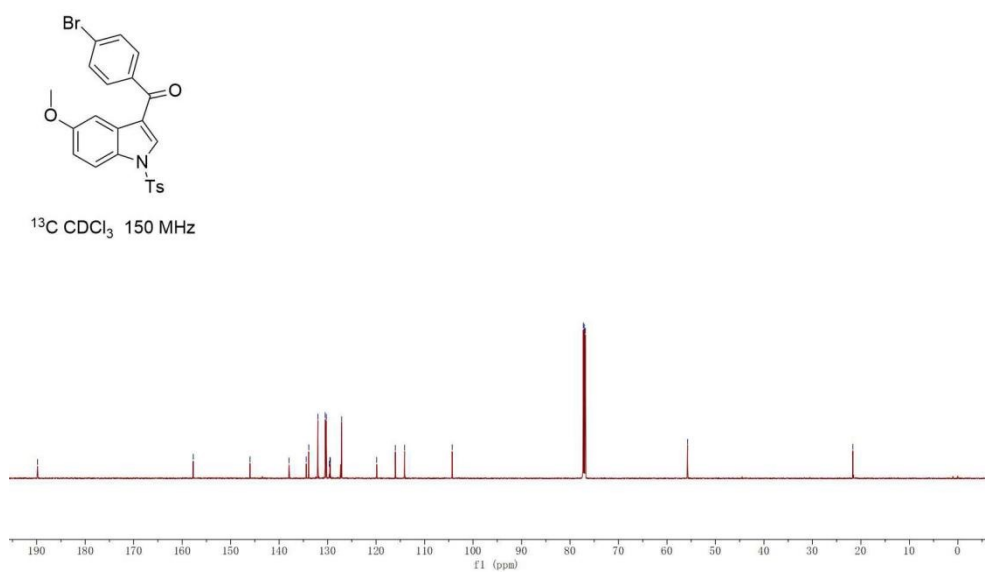

3ae

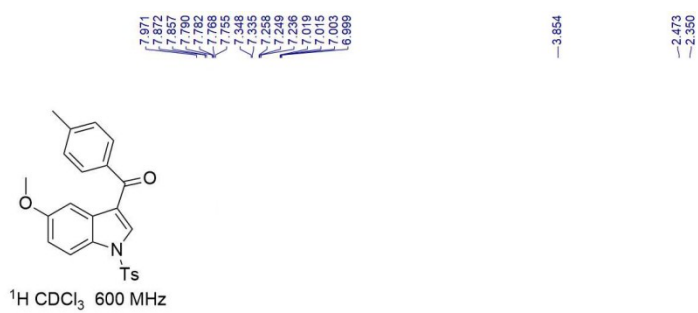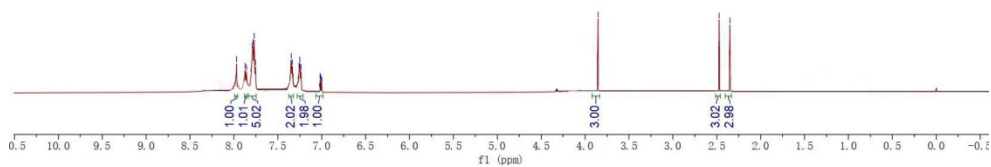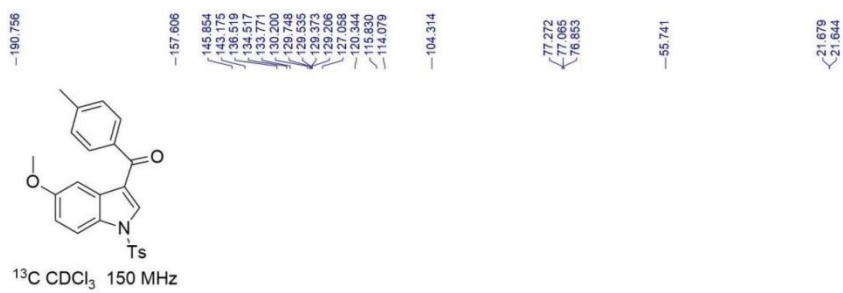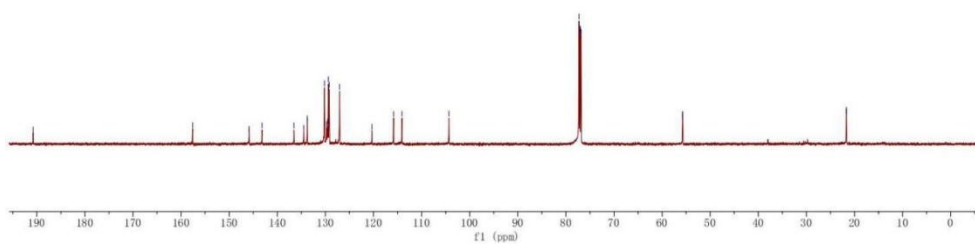

3af

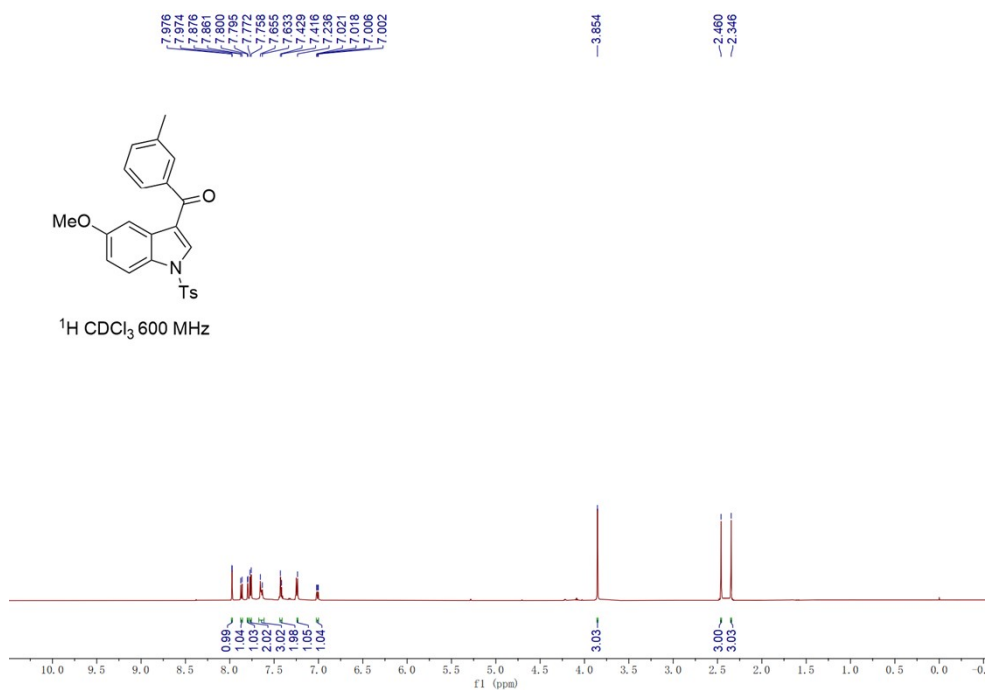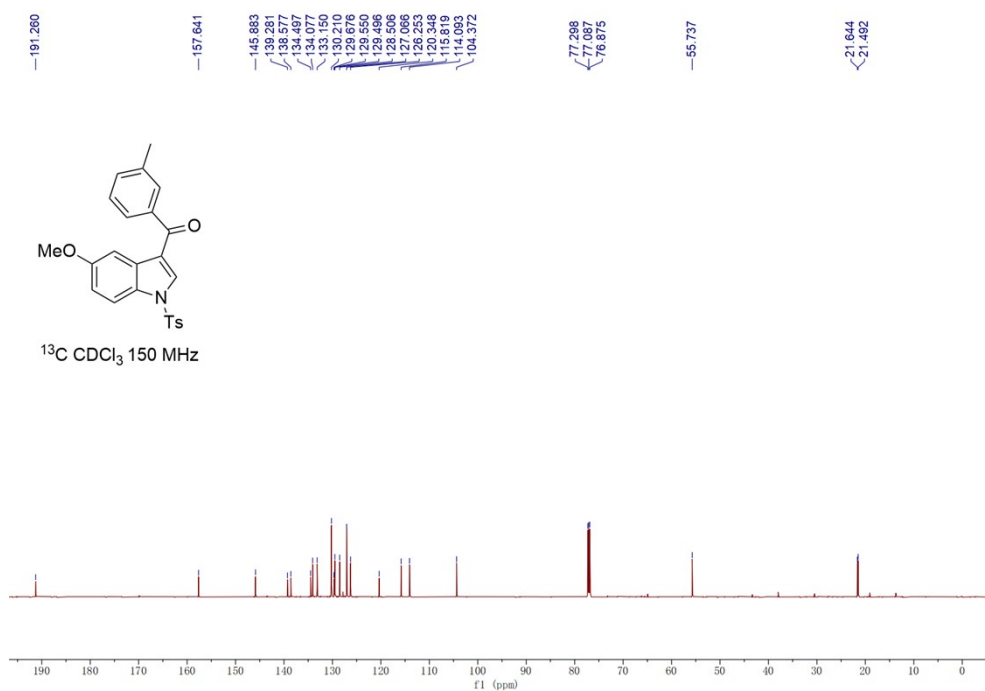

3ag

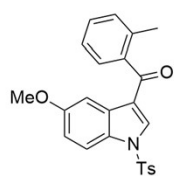

$^1\text{H}$   $\text{CDCl}_3$  600 MHz

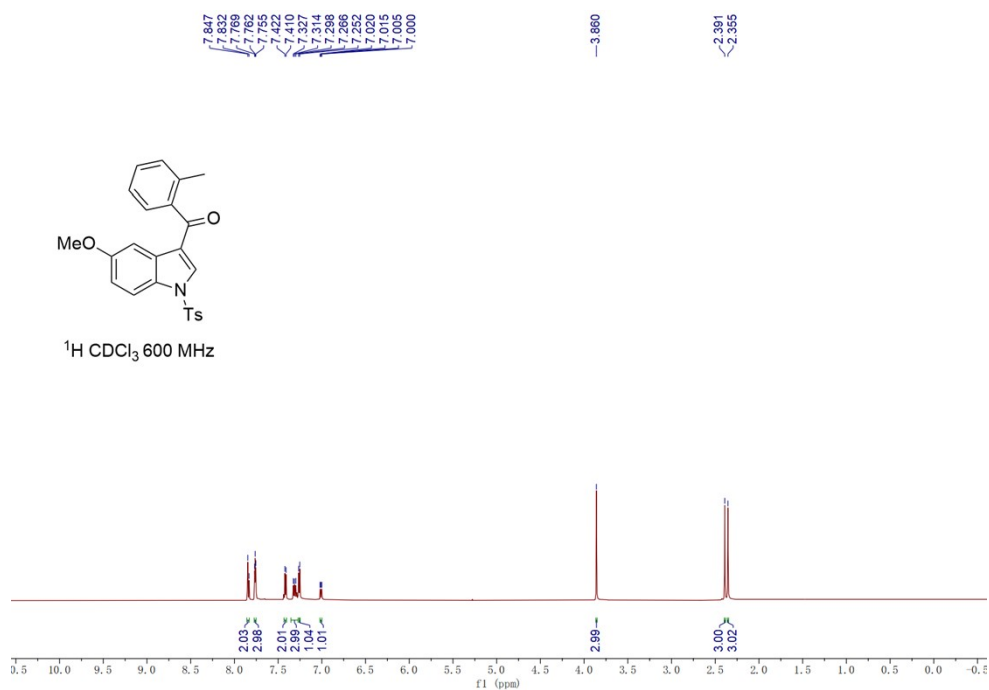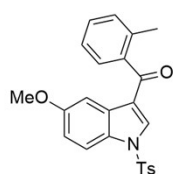

$^{13}\text{C}$   $\text{CDCl}_3$  150 MHz

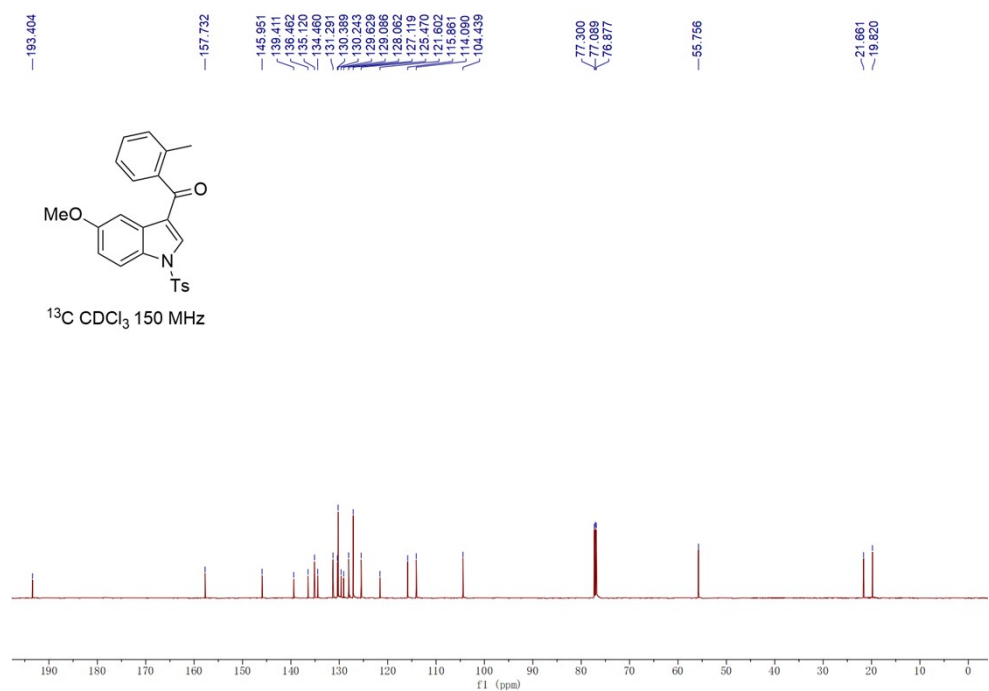

3ah

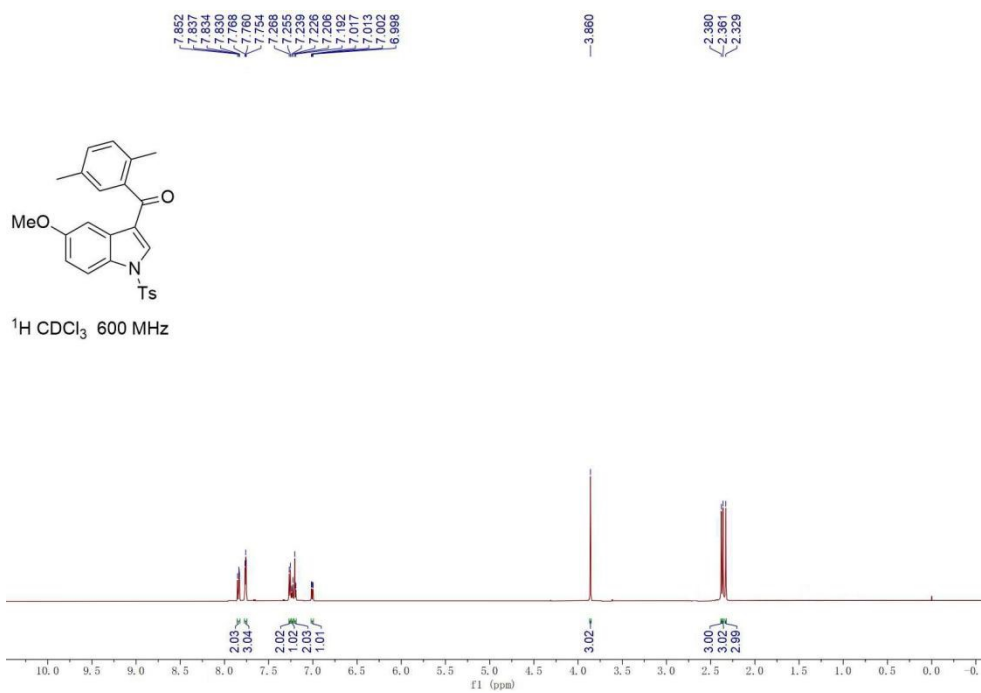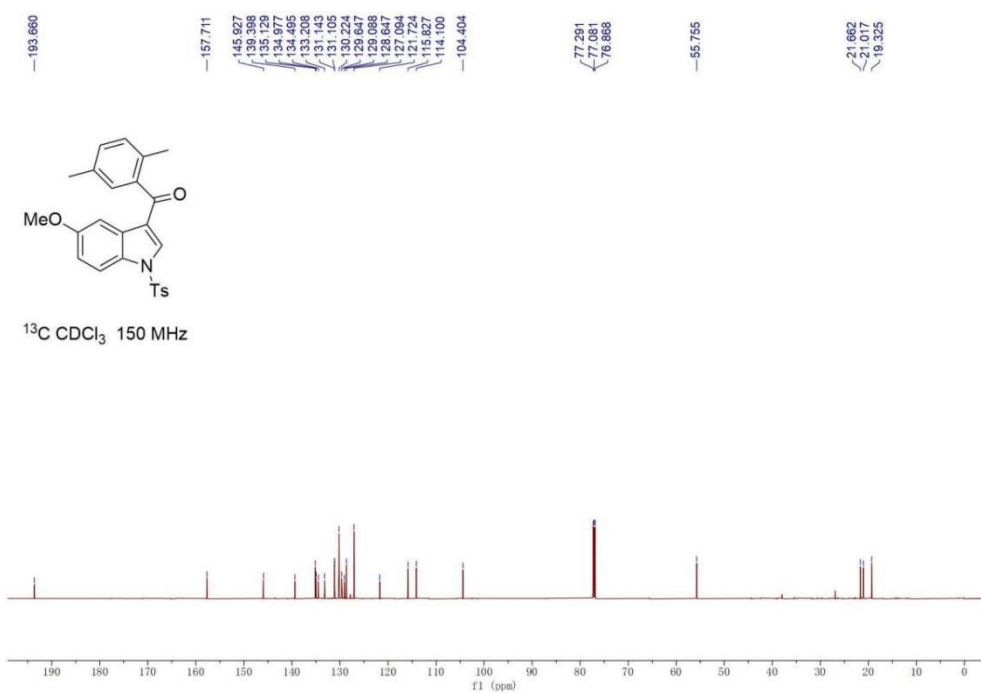



3ai

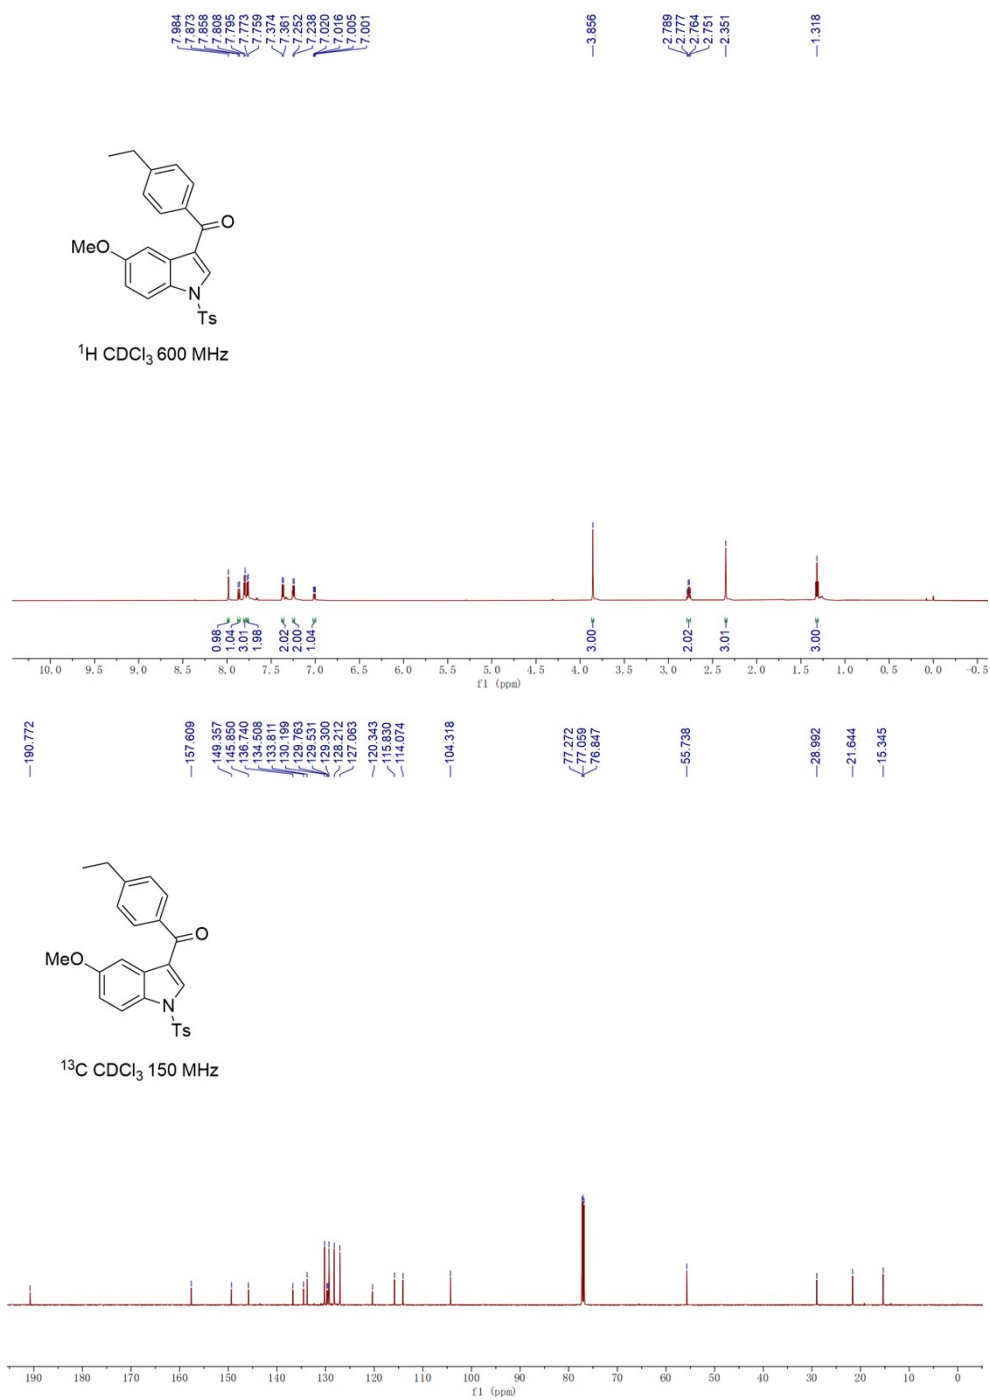

3aj

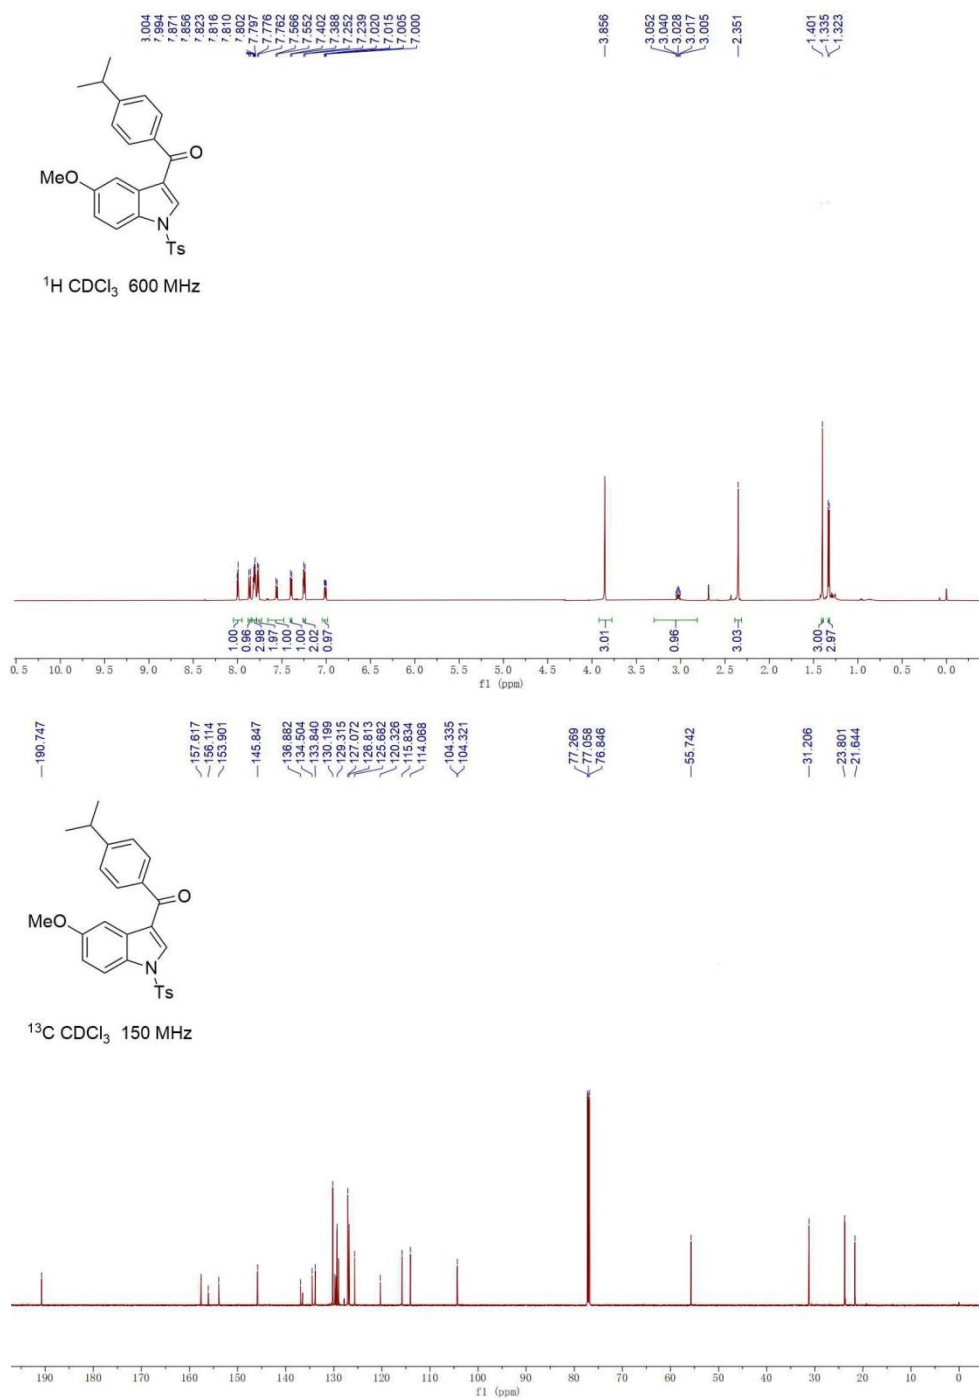

3ak

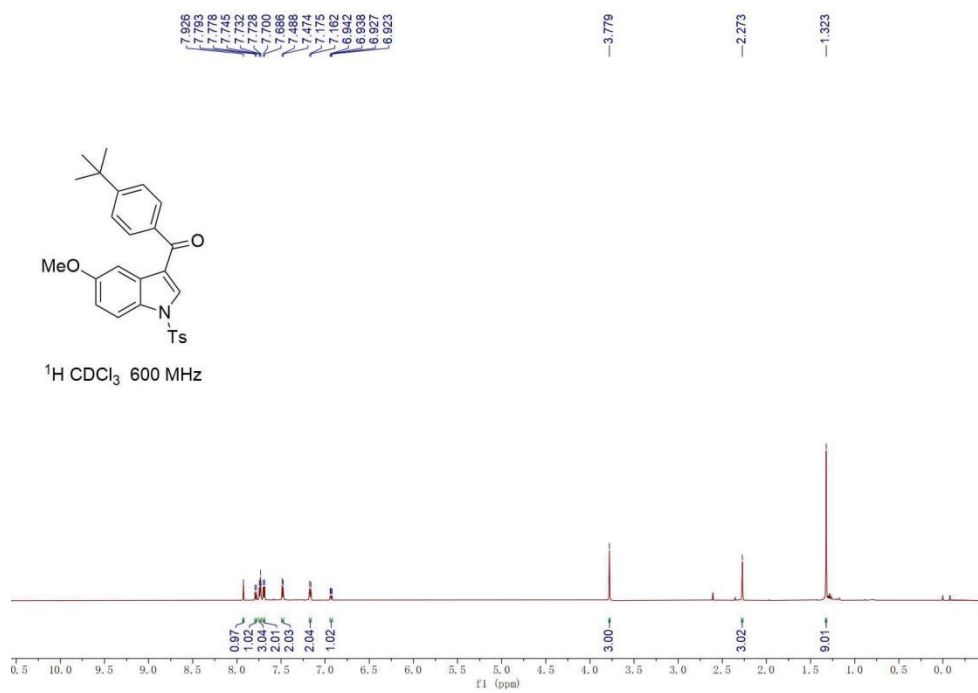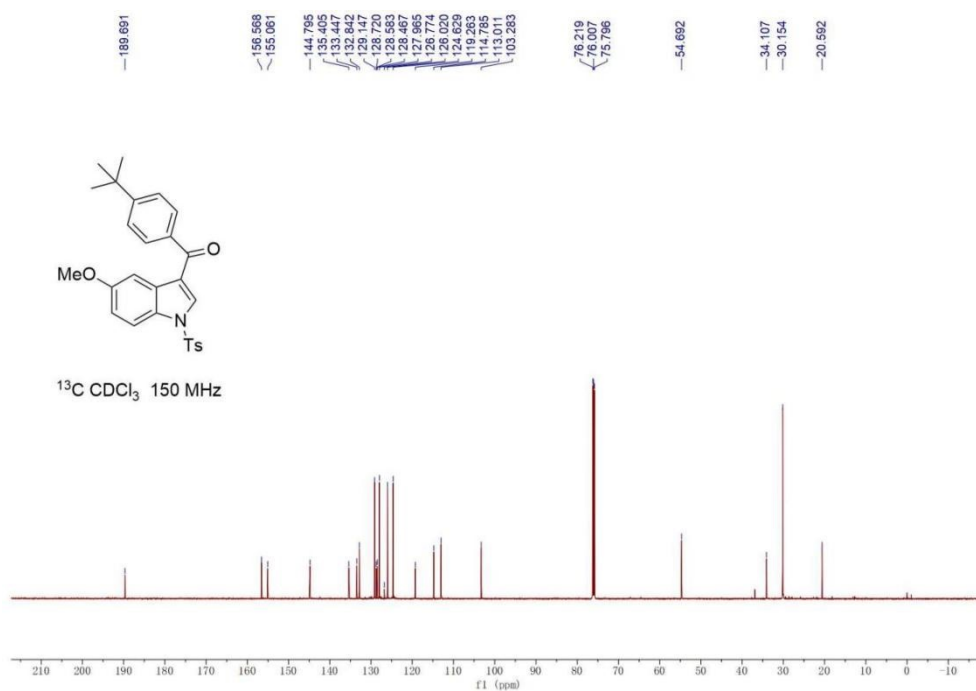

3al

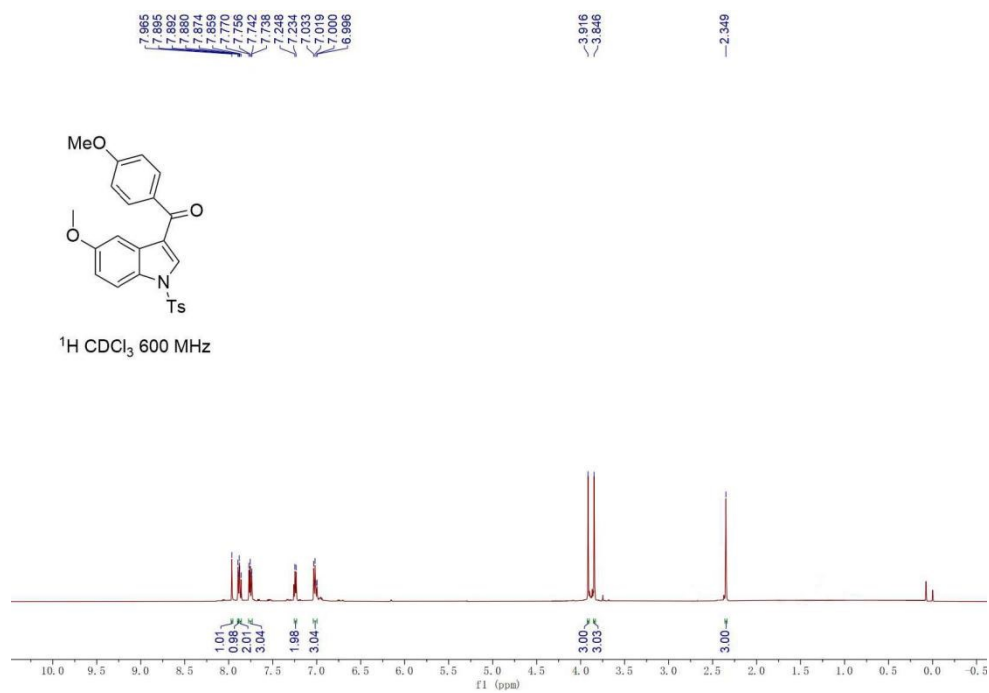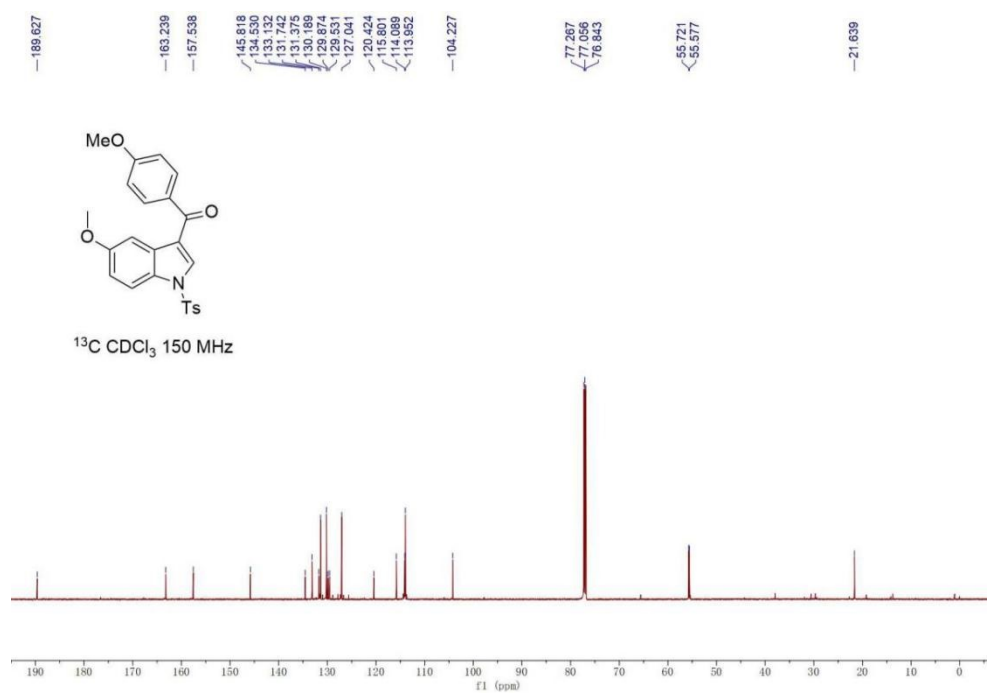

3am

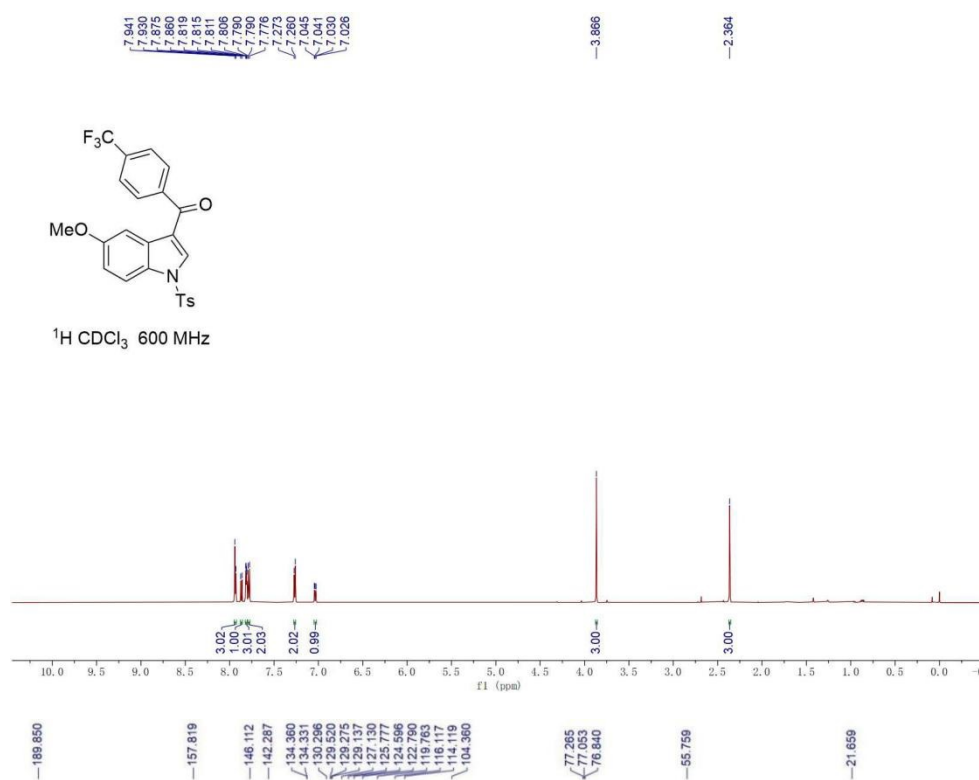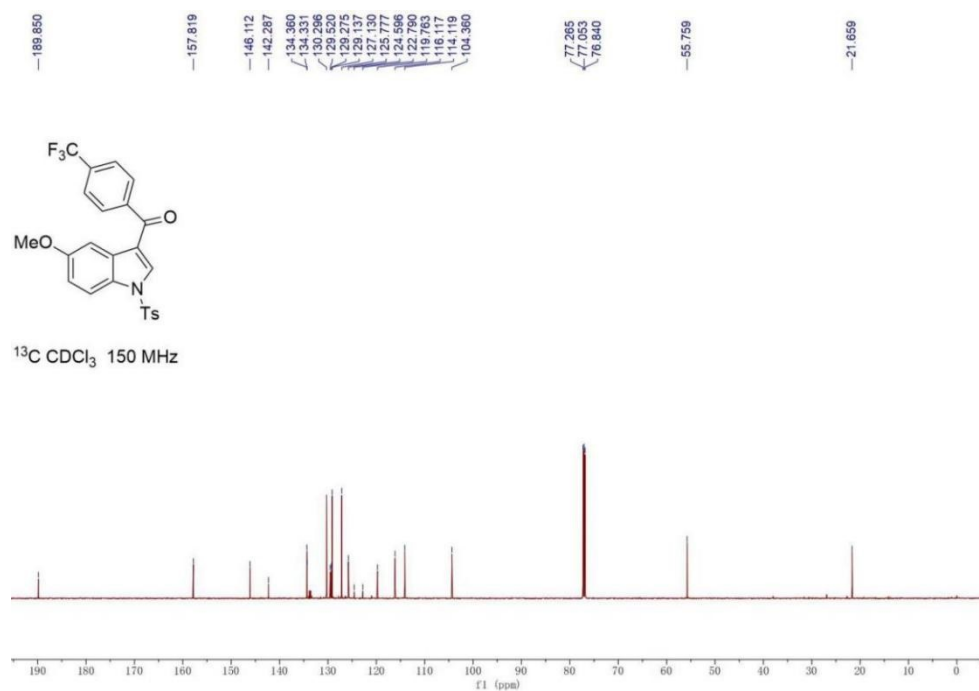

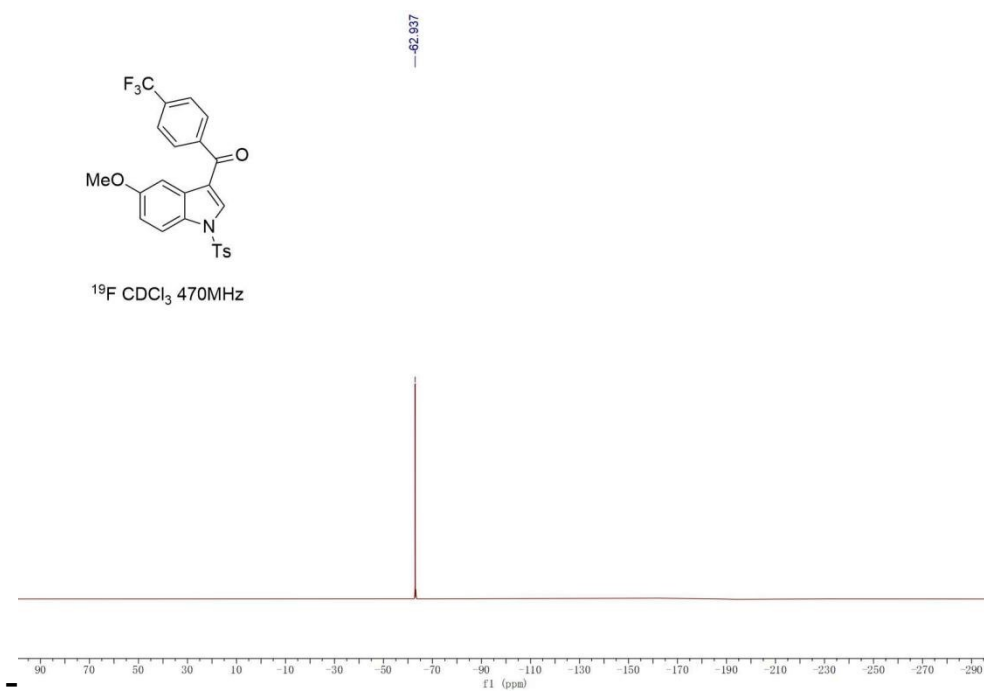

**3an**

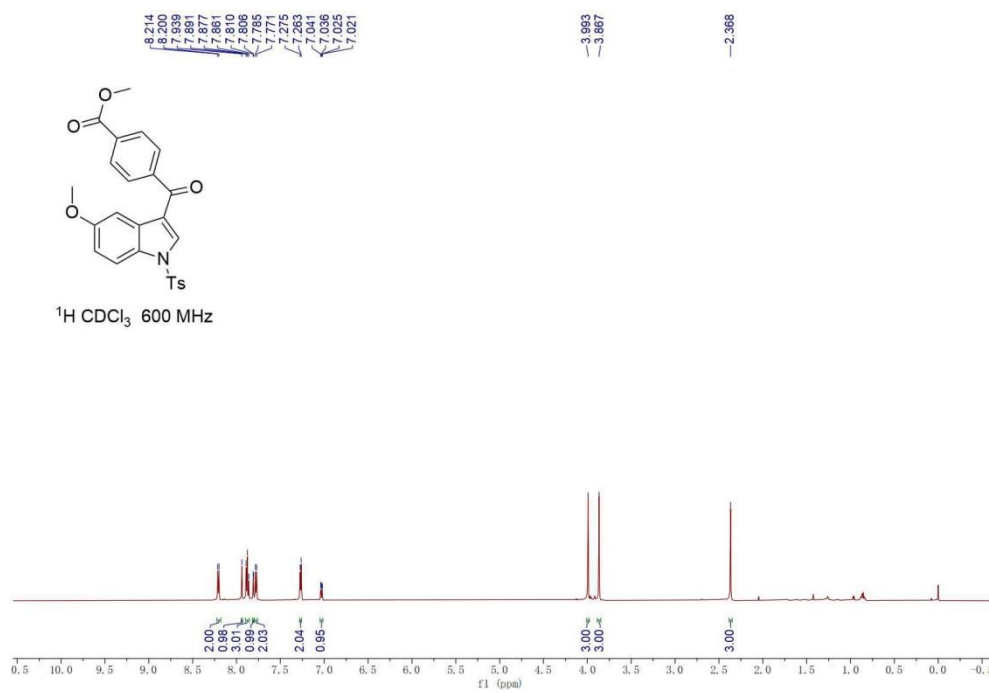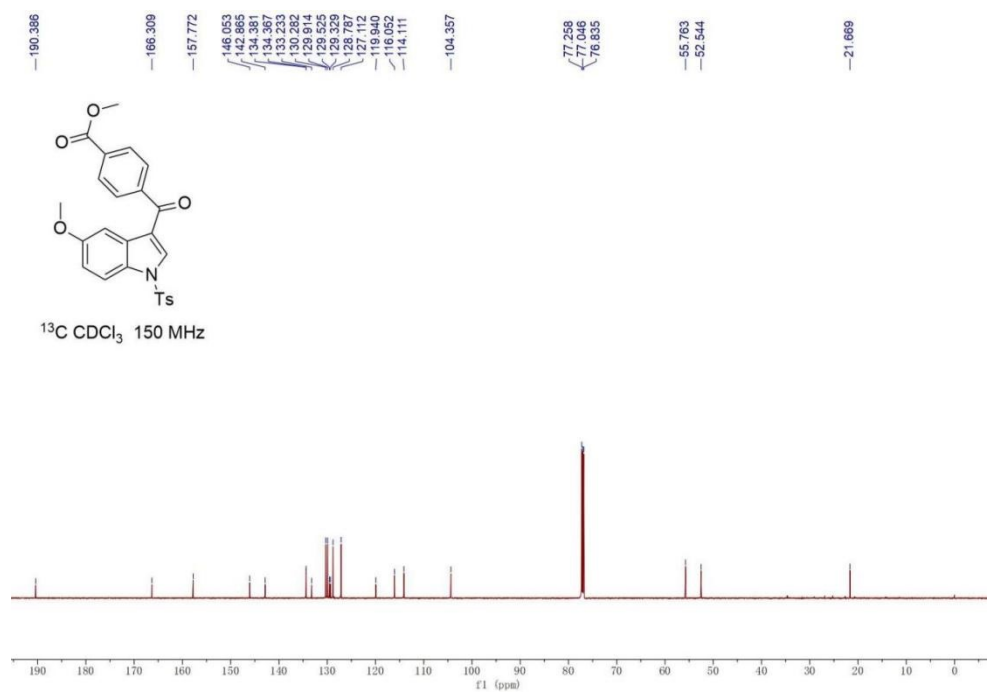

3ao

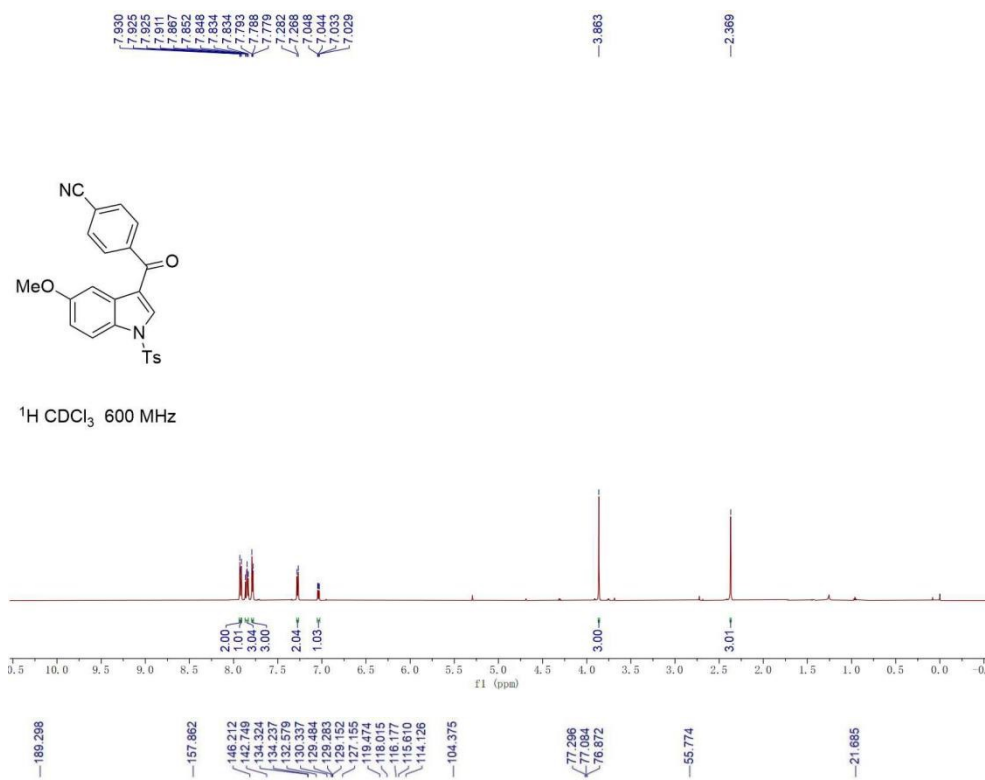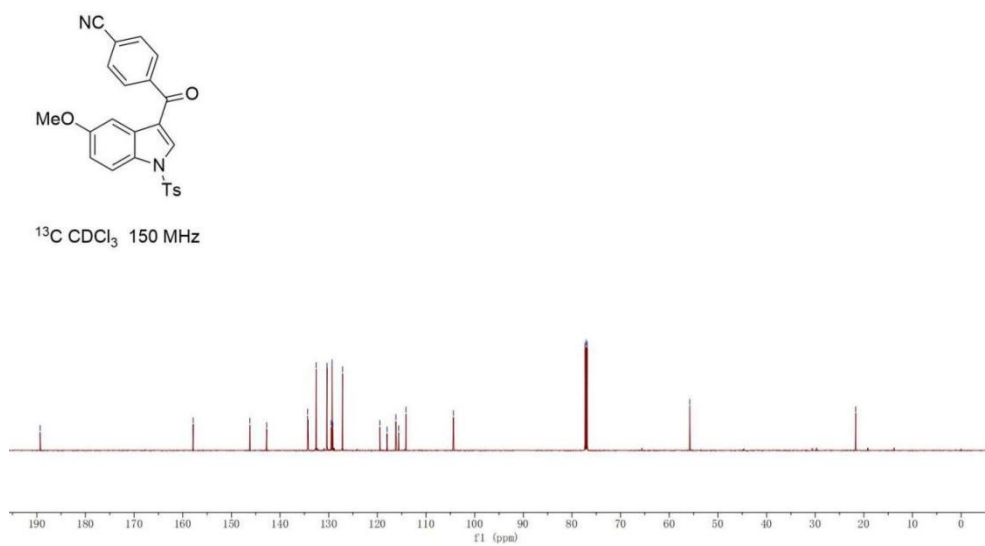



3ap

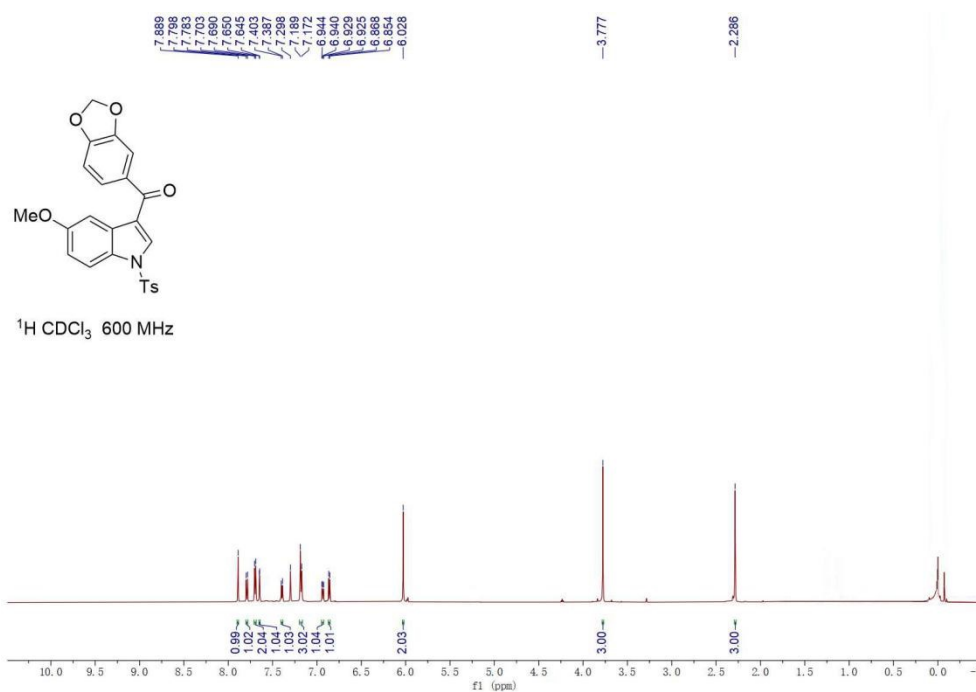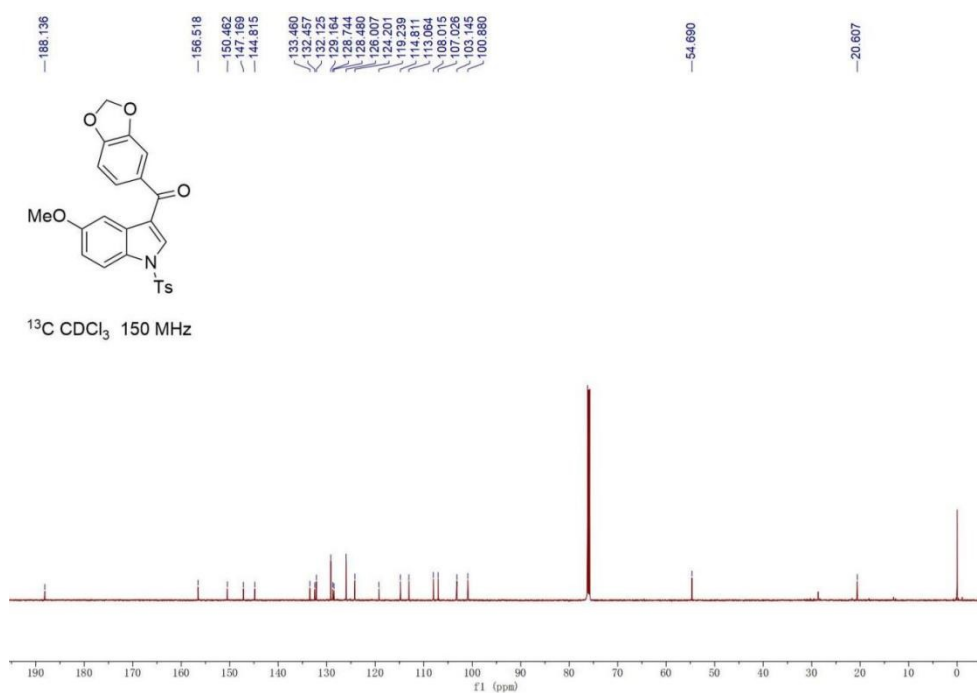

3ba

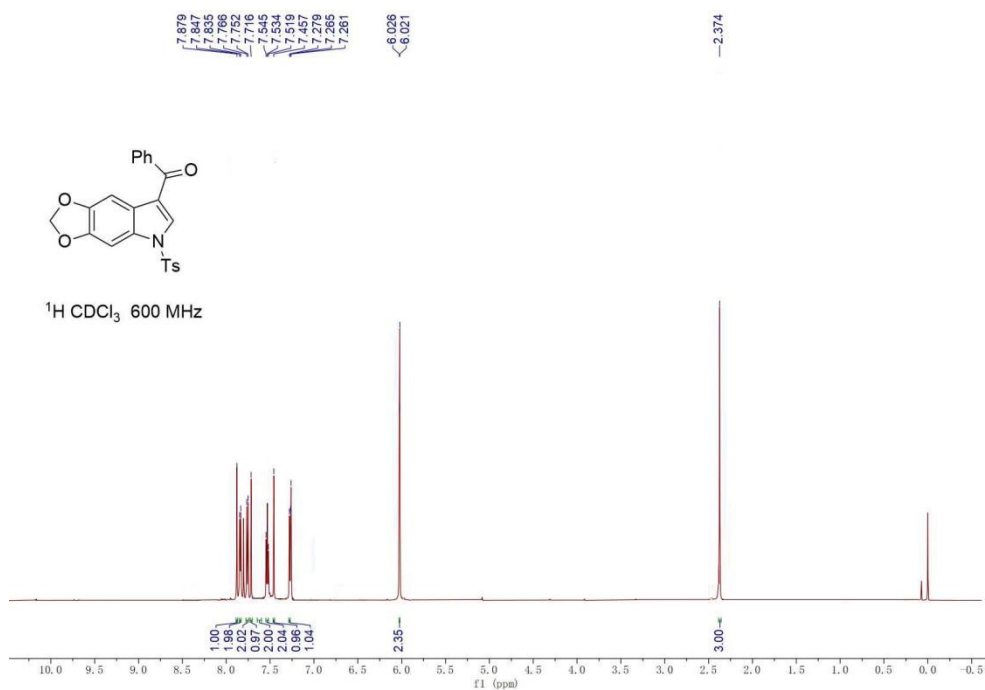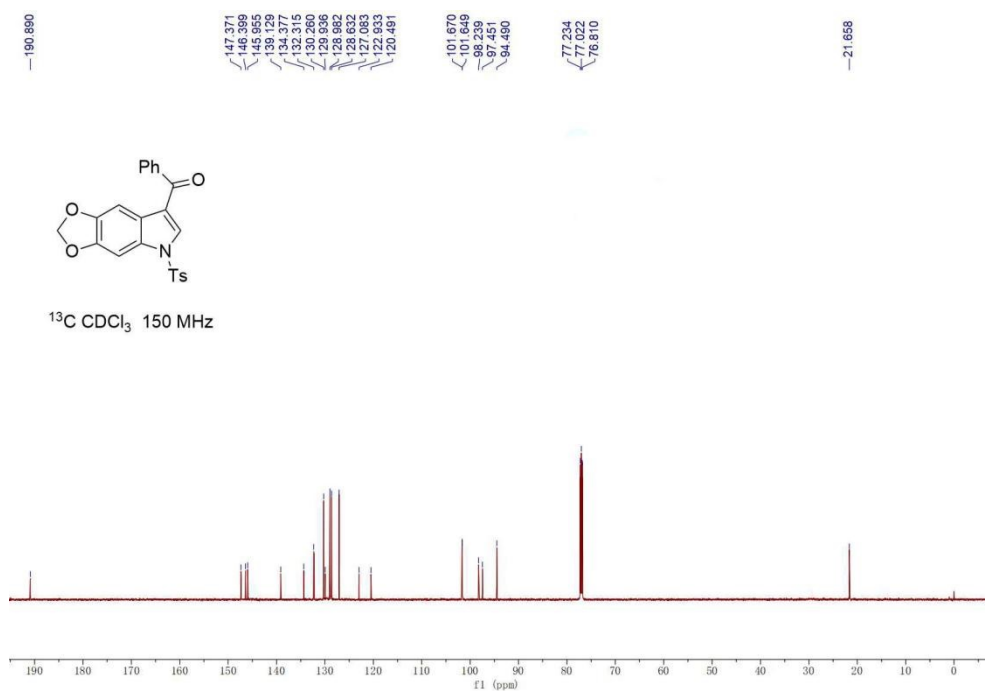

3ca

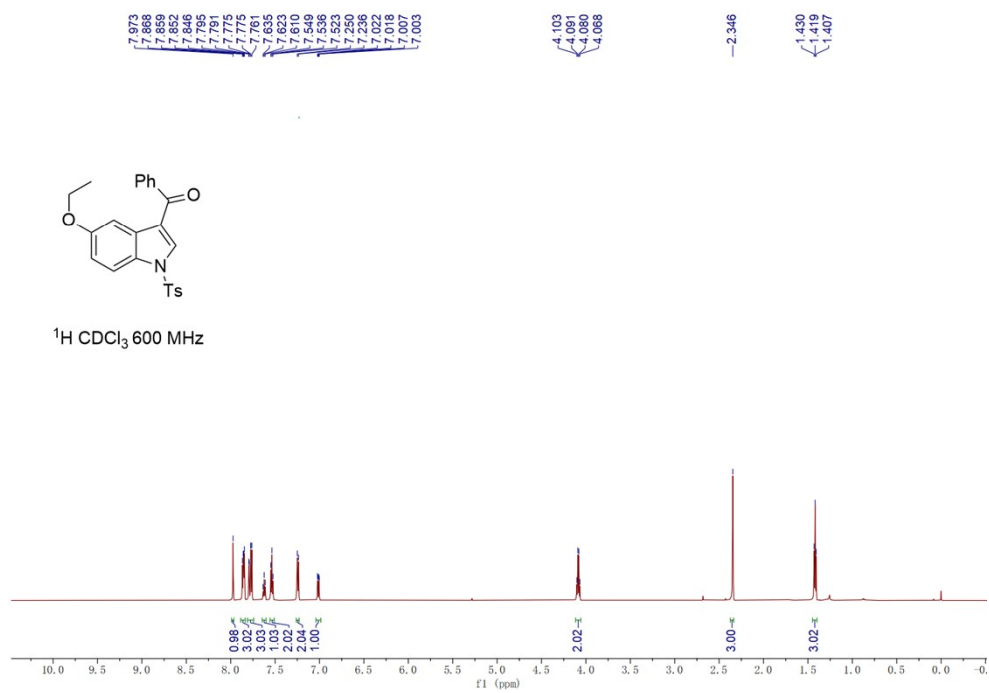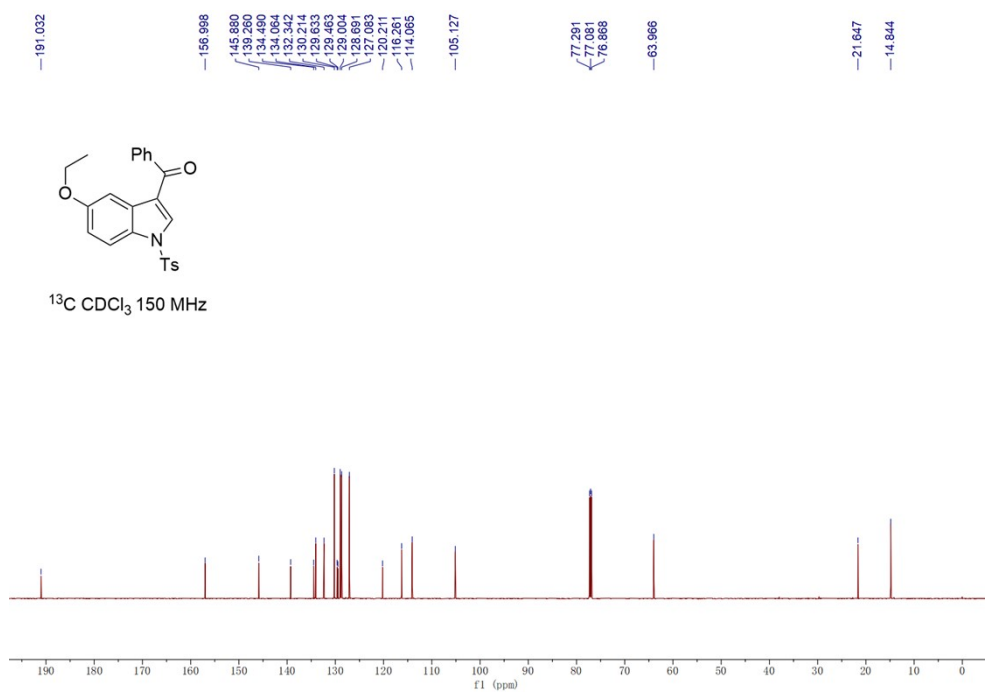

3ea

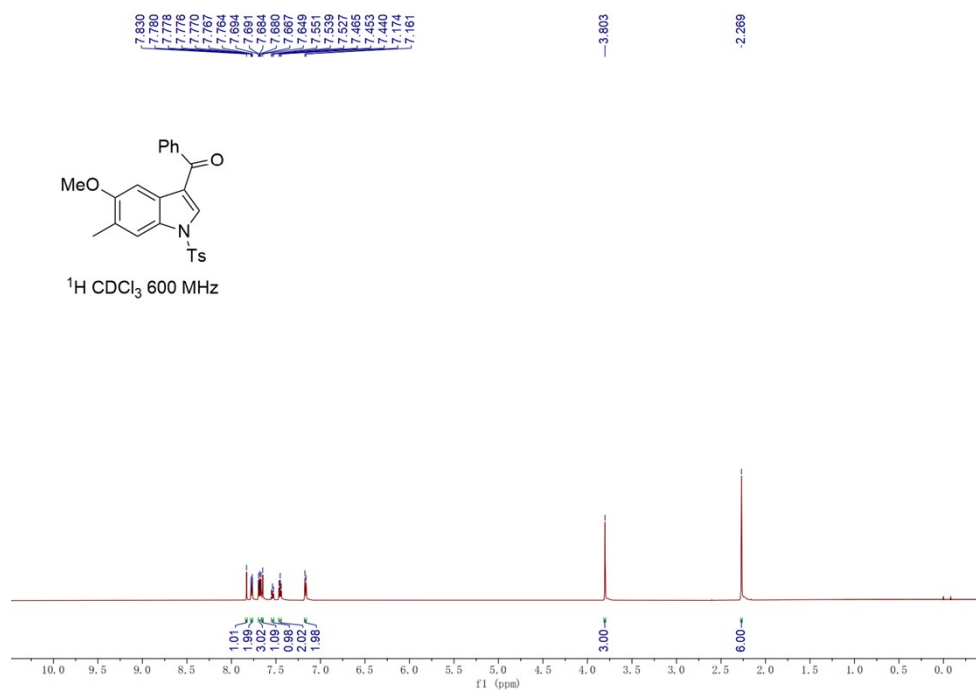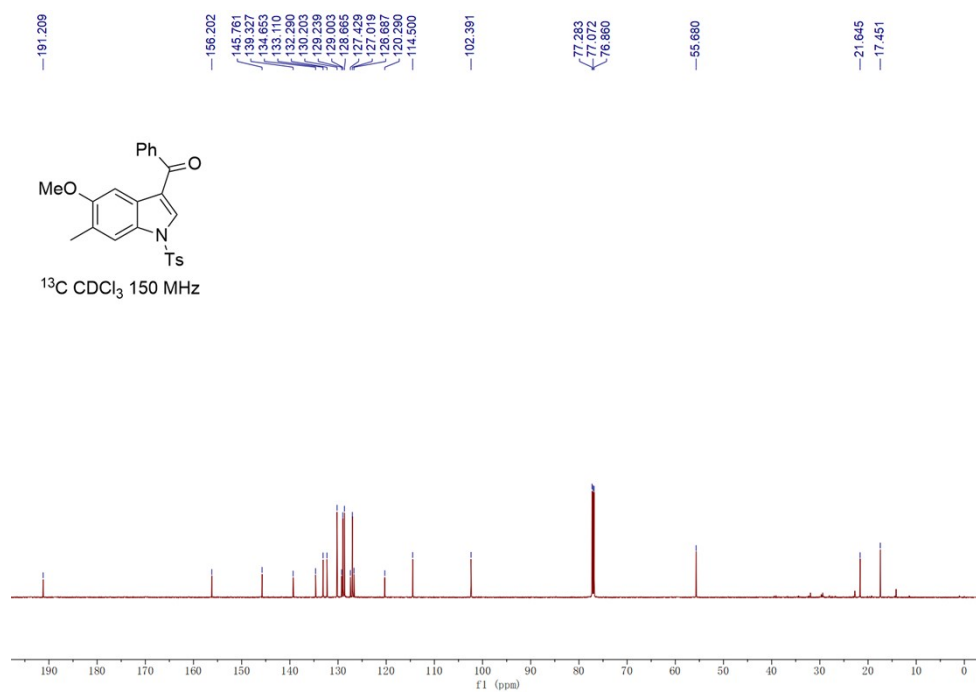

3ia

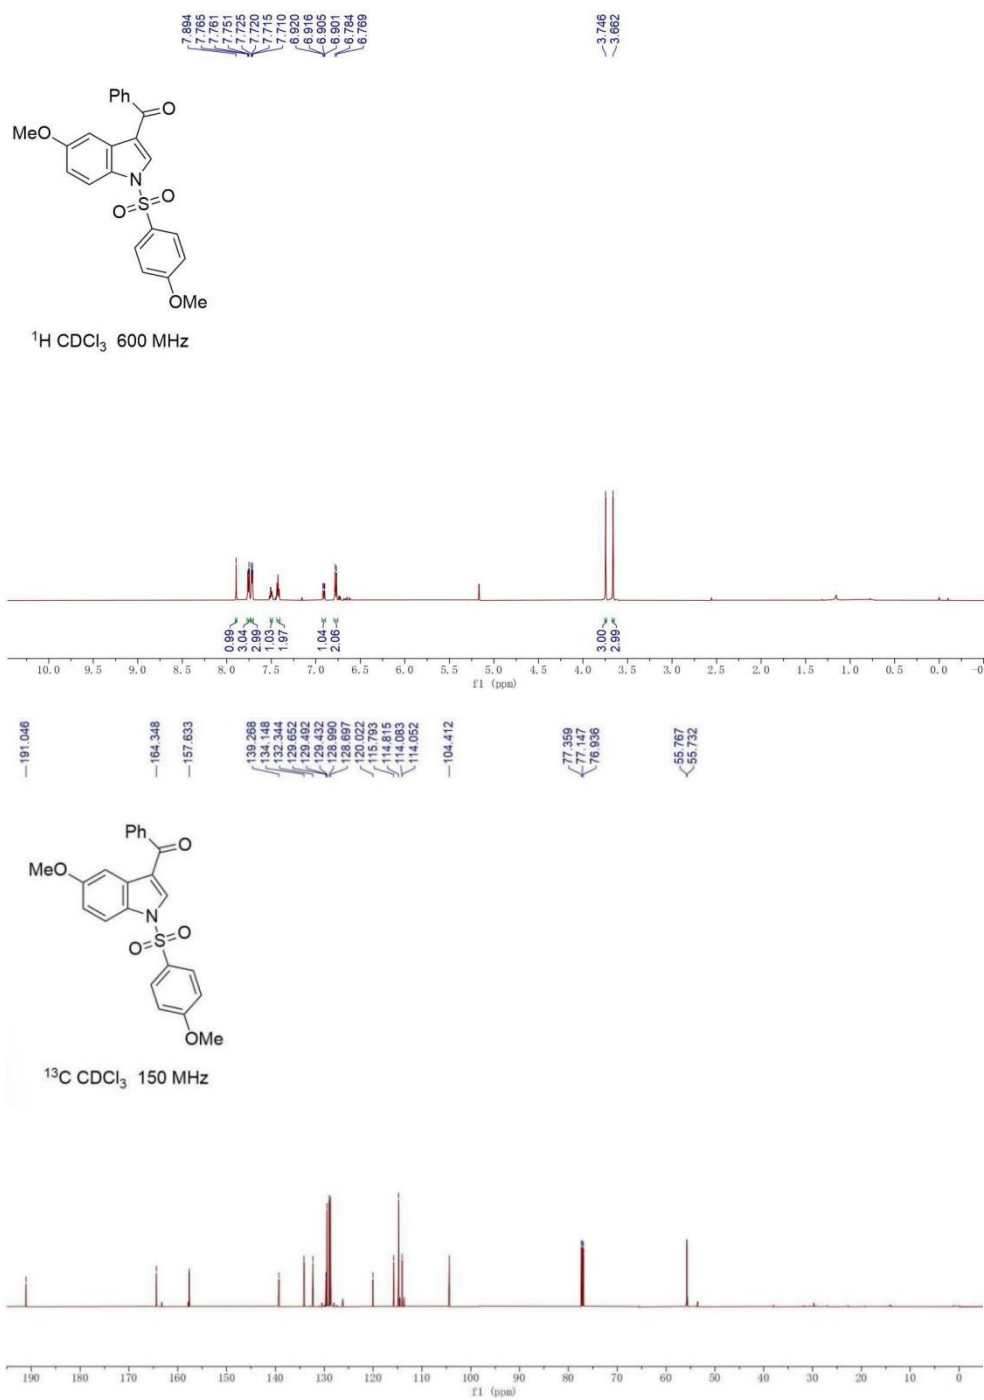

3ja

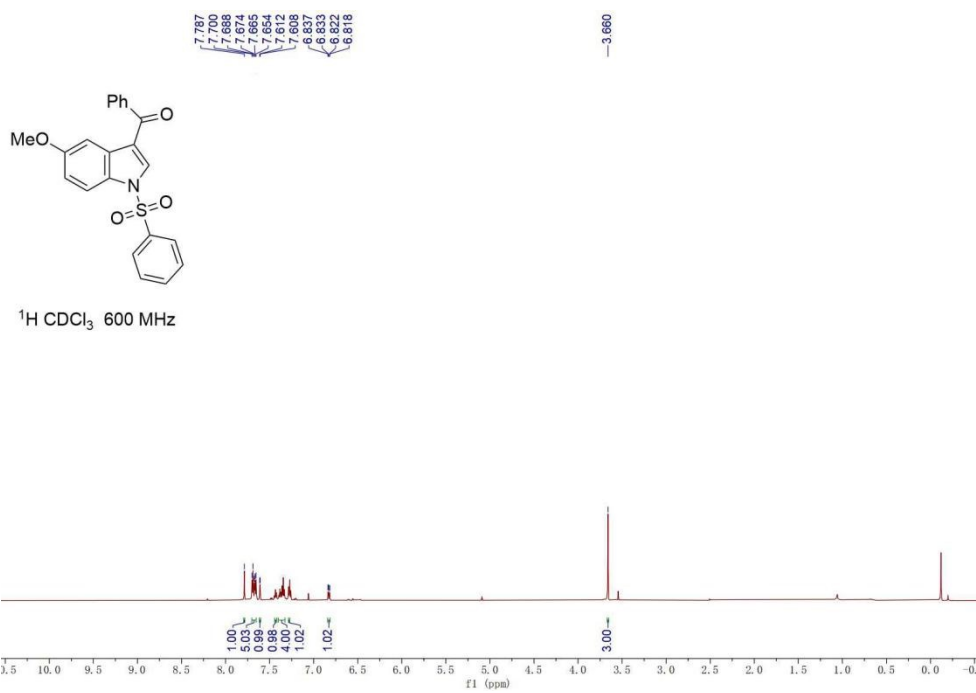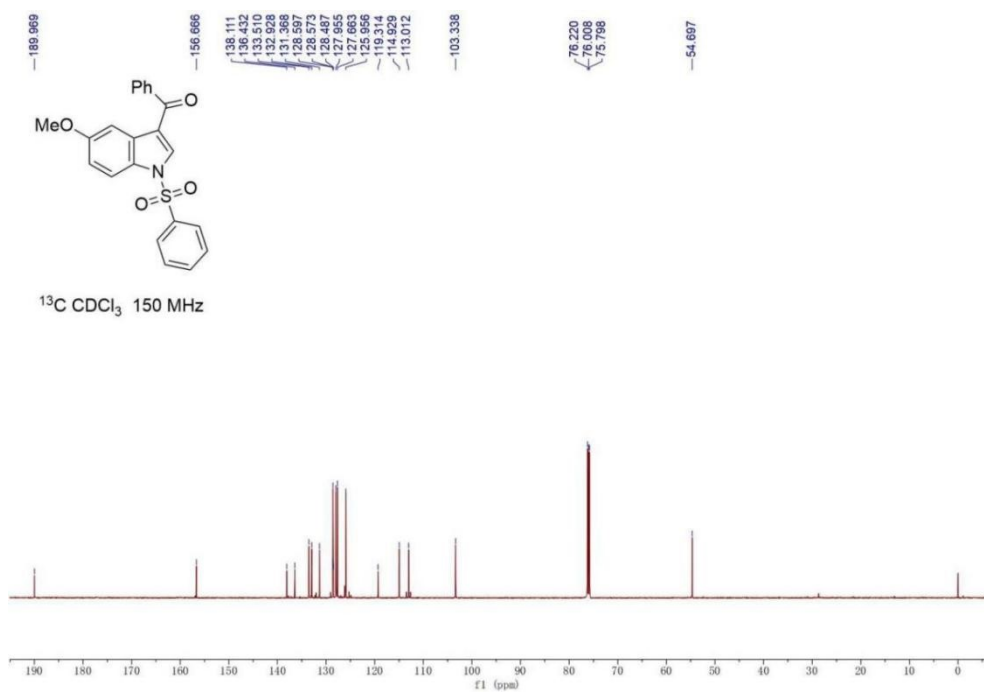

3ka

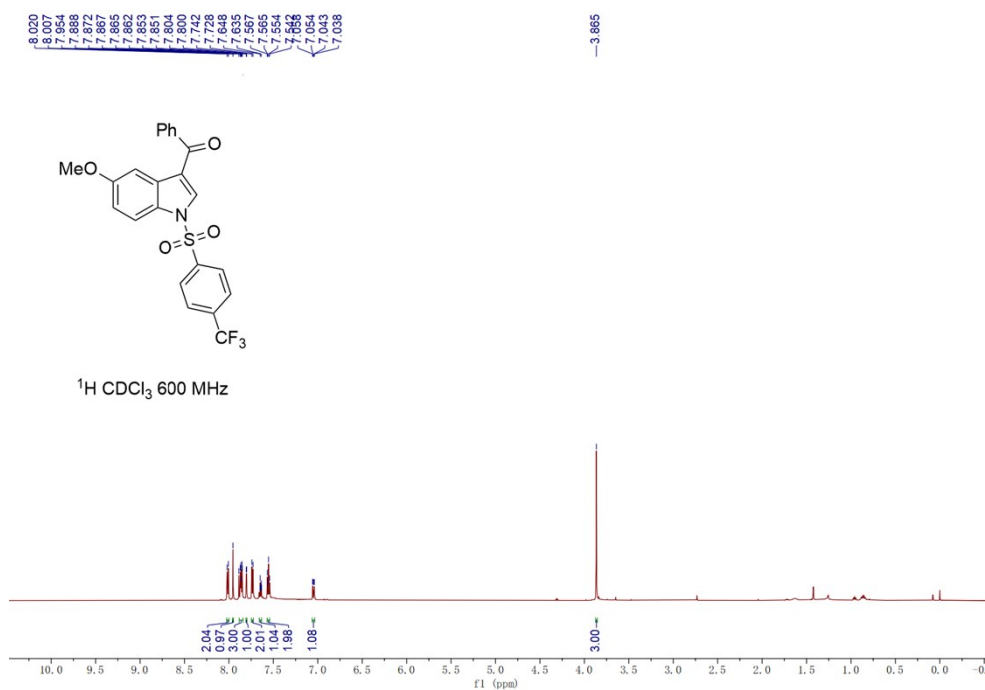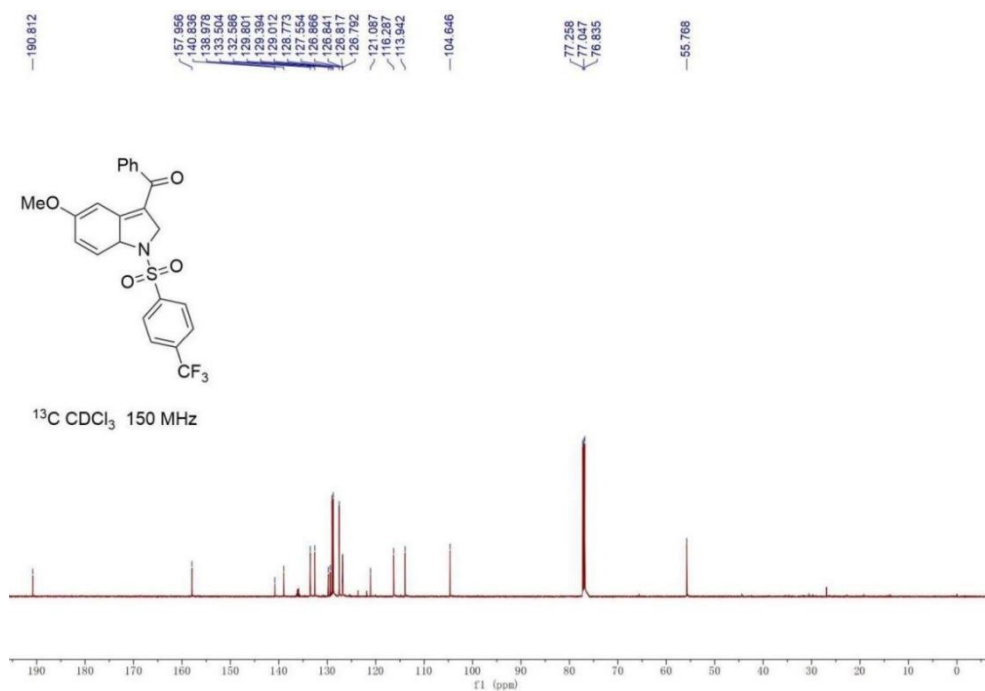

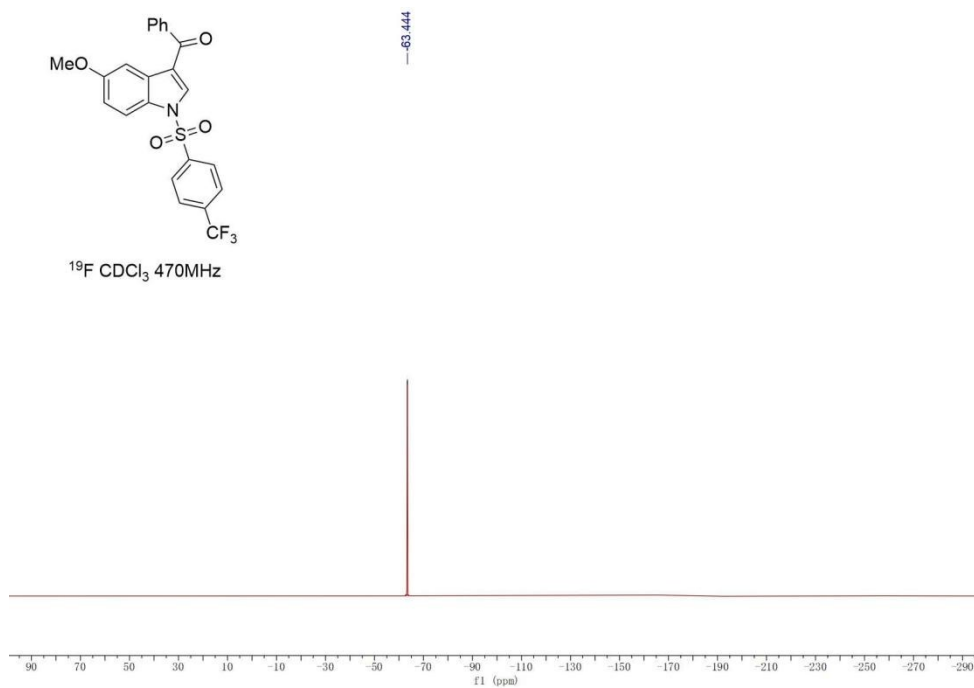



3la

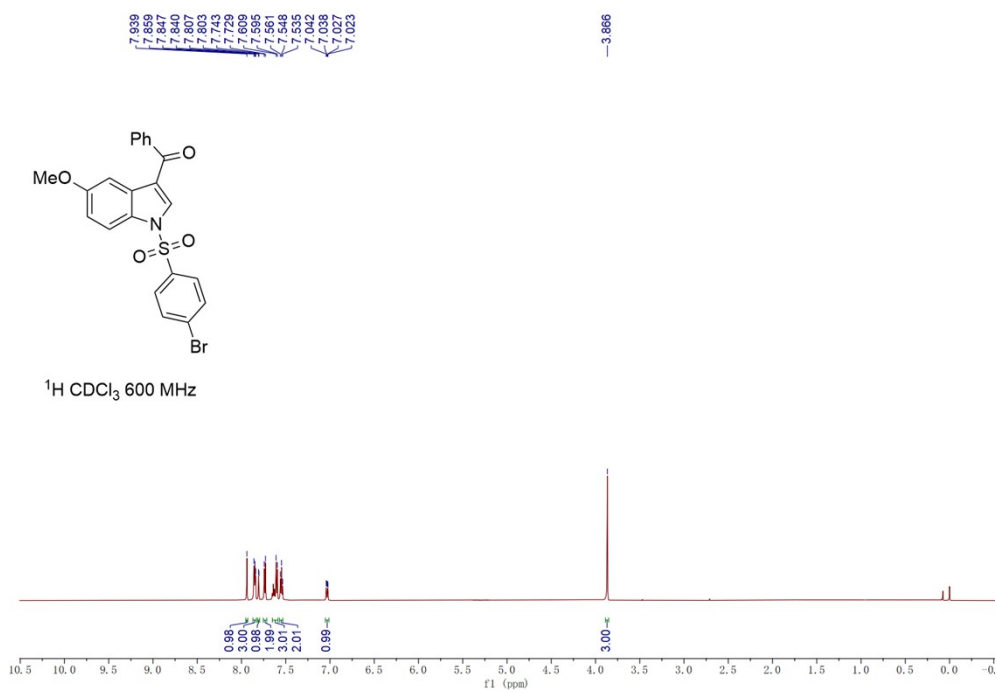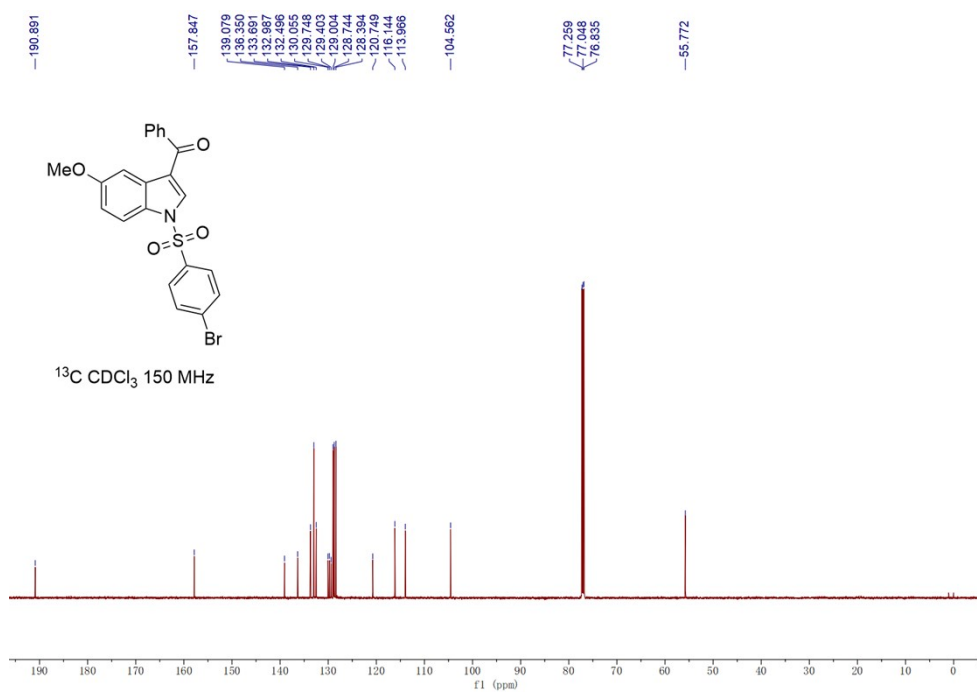

3ma

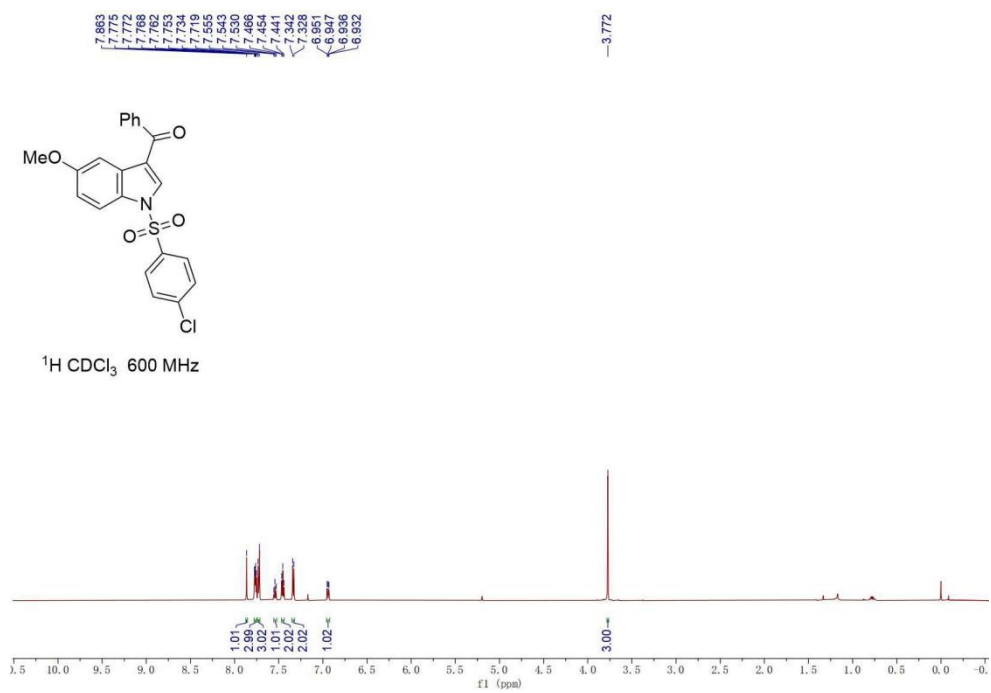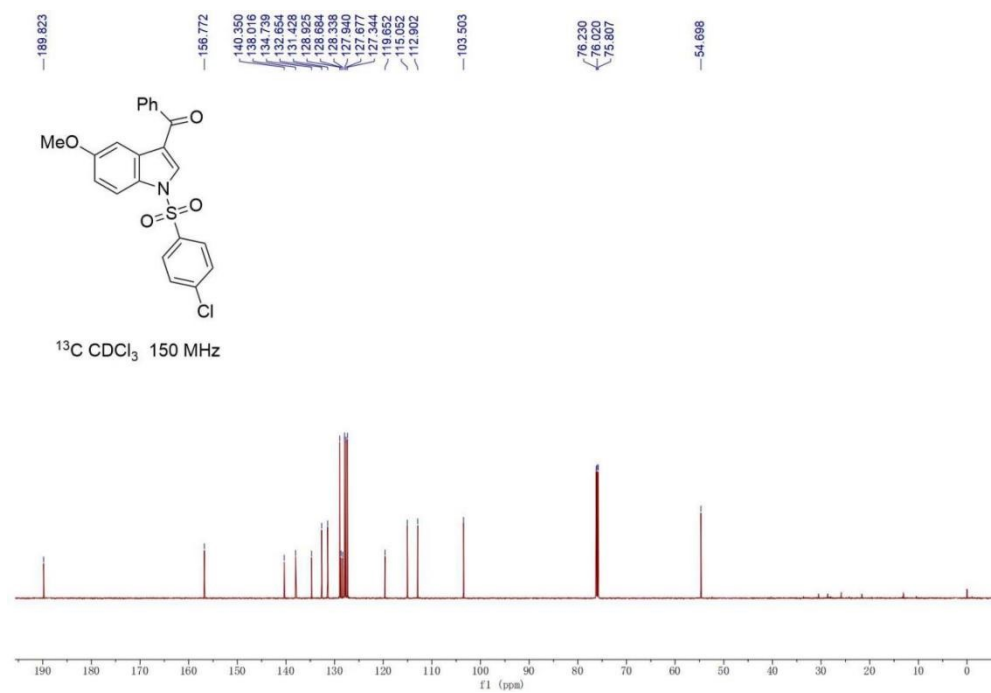

3na

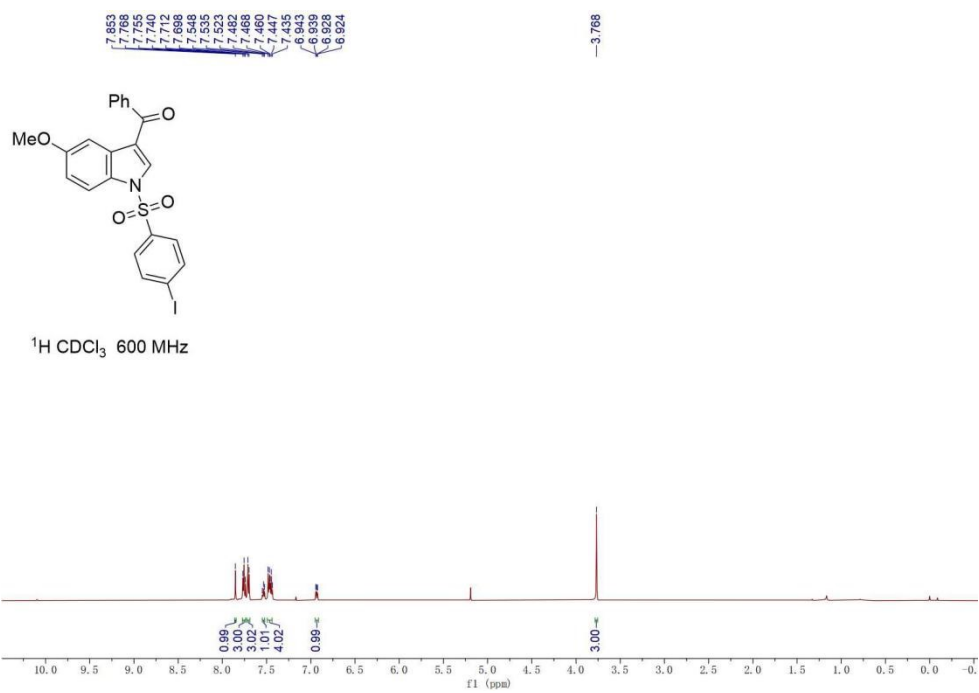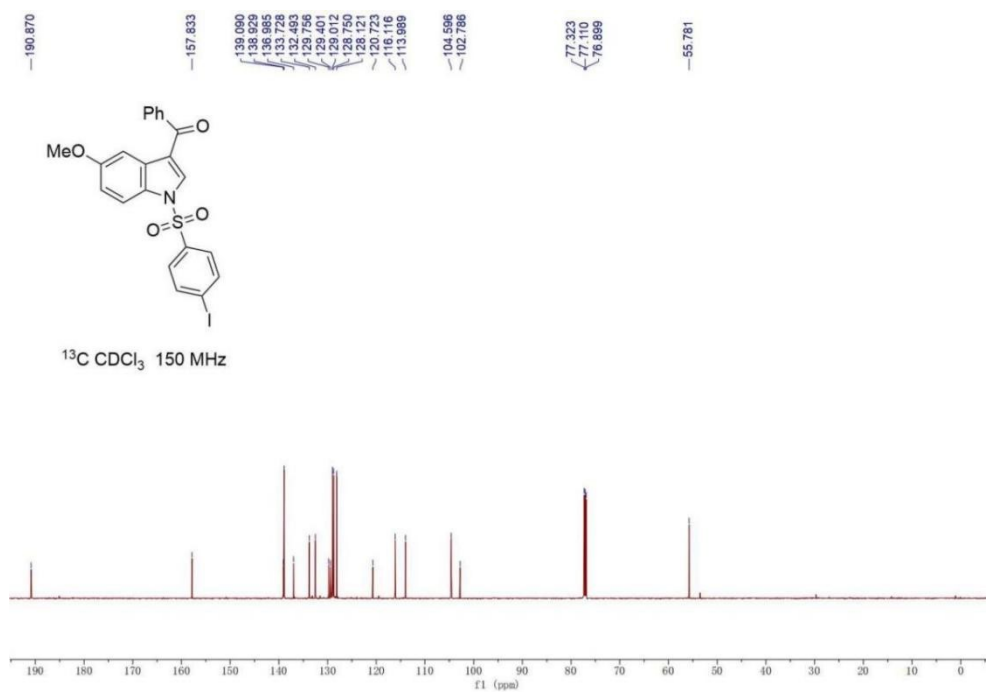

30a

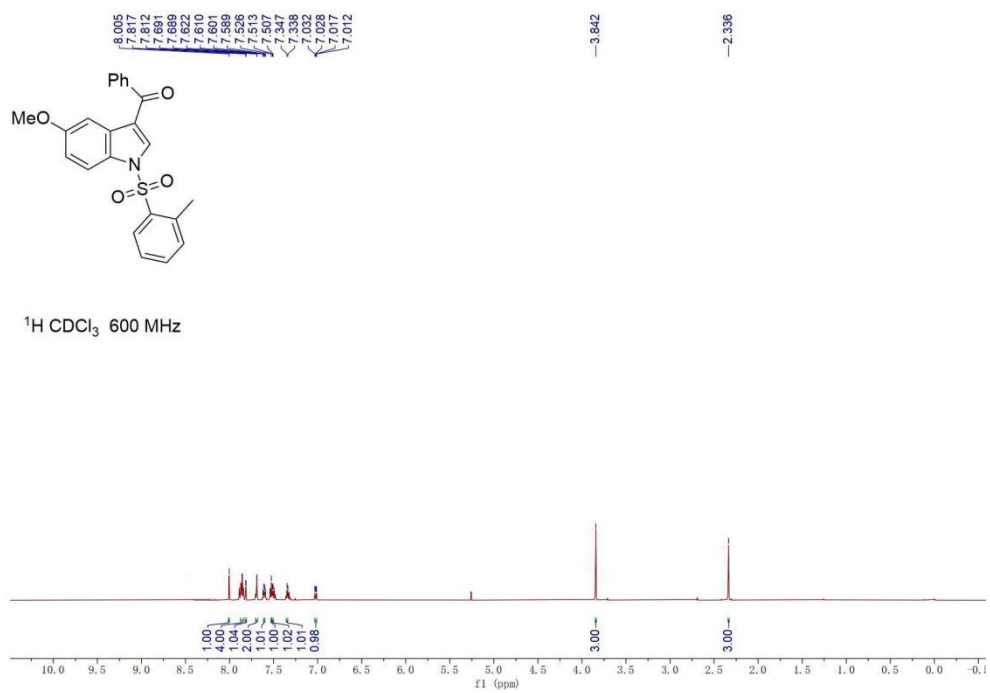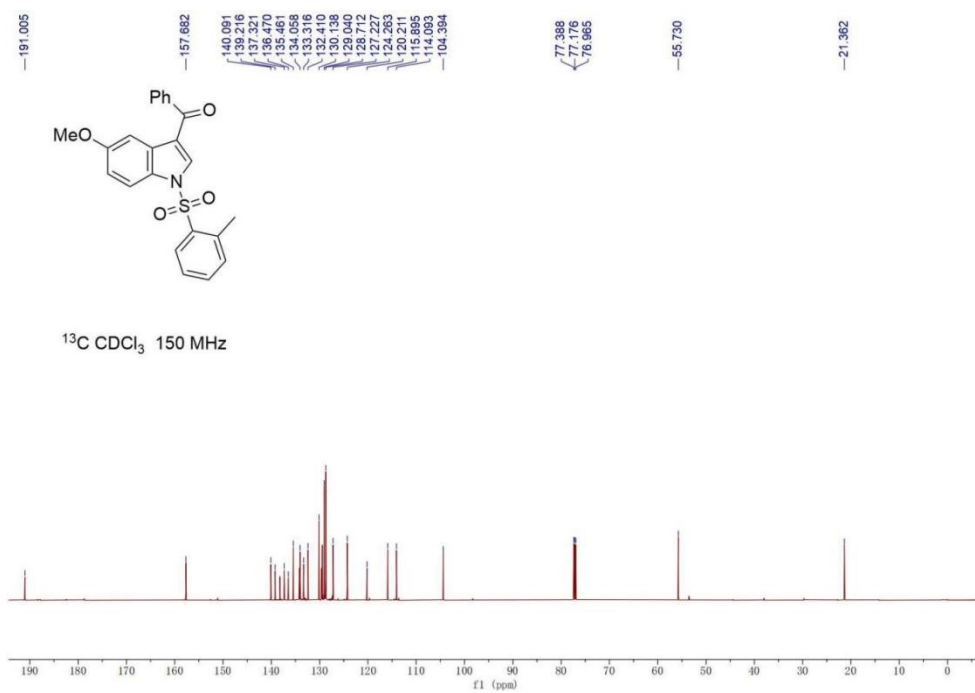

3pa

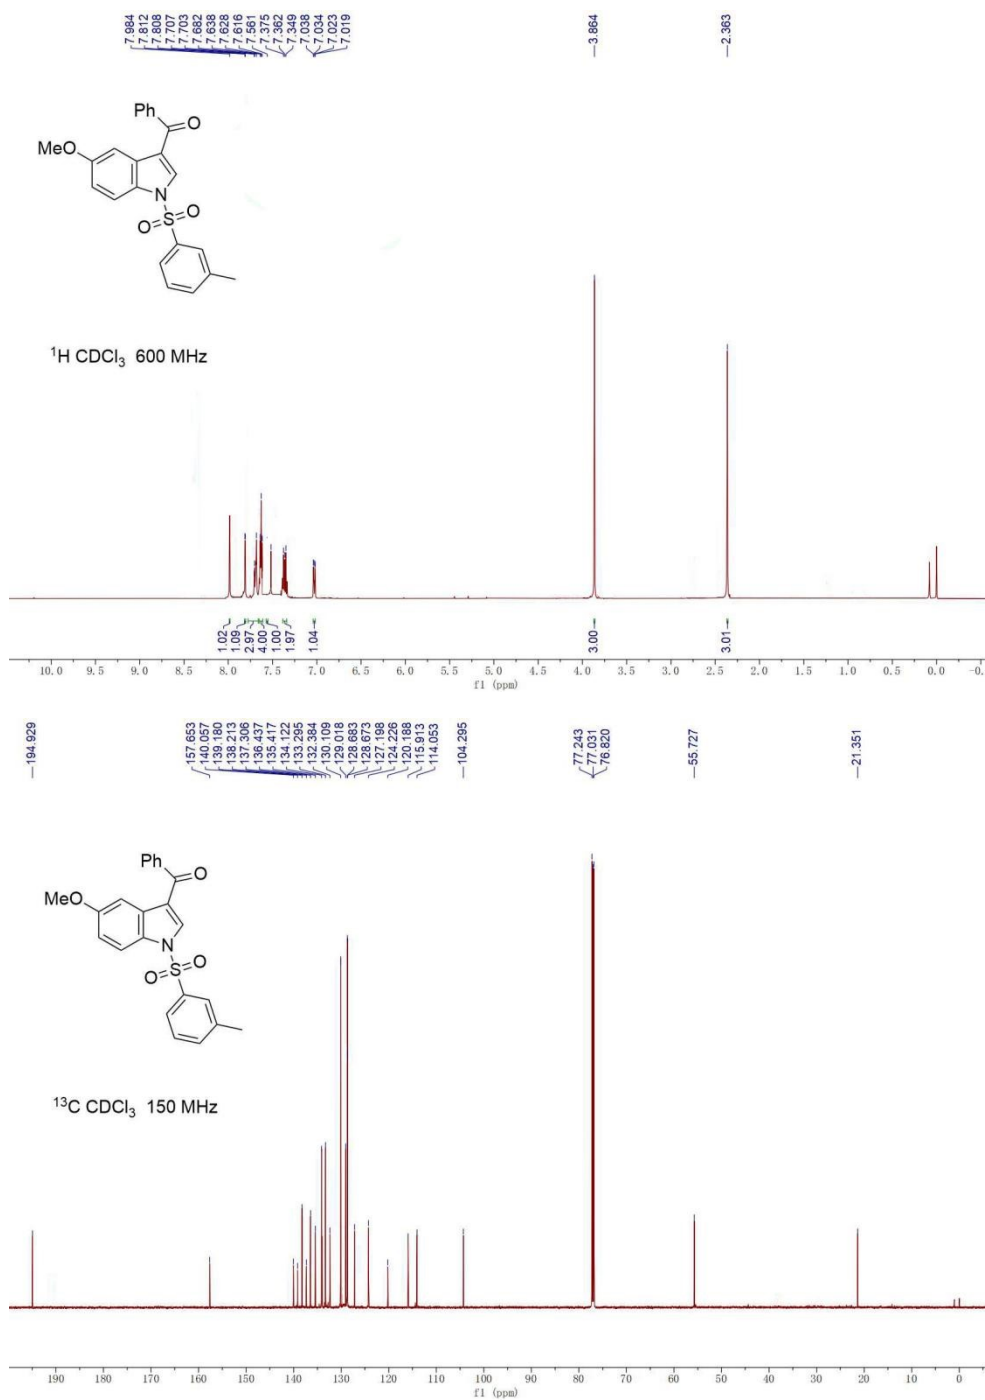

3c

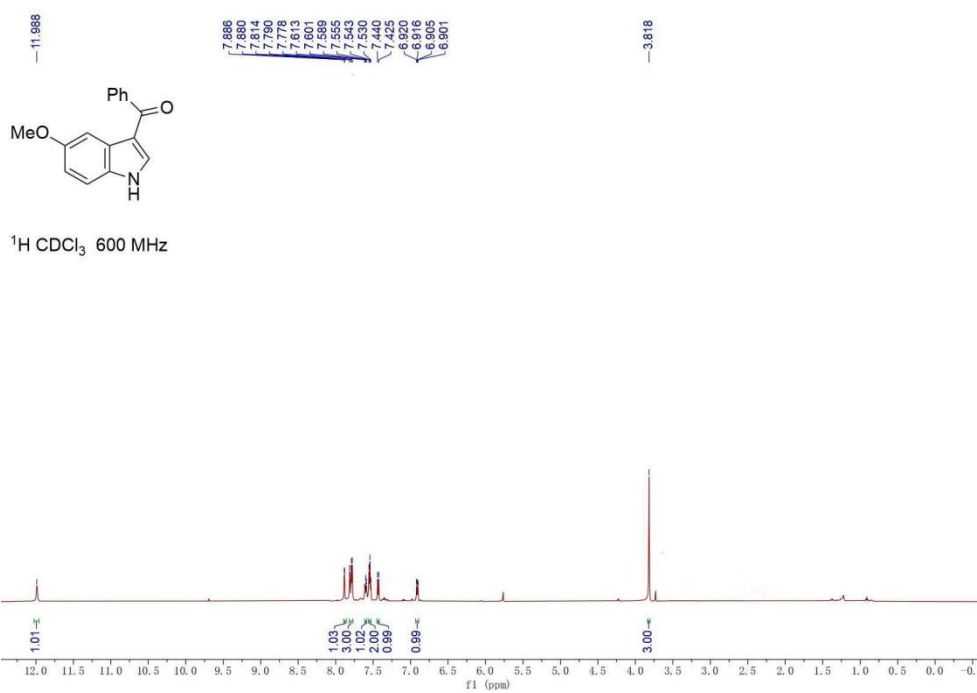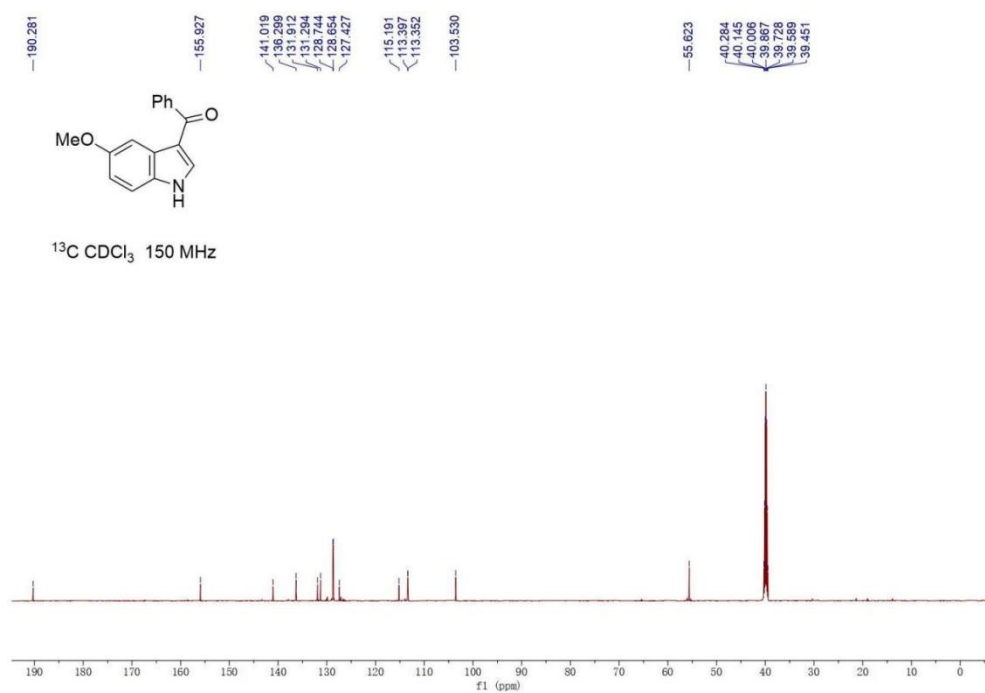

4a

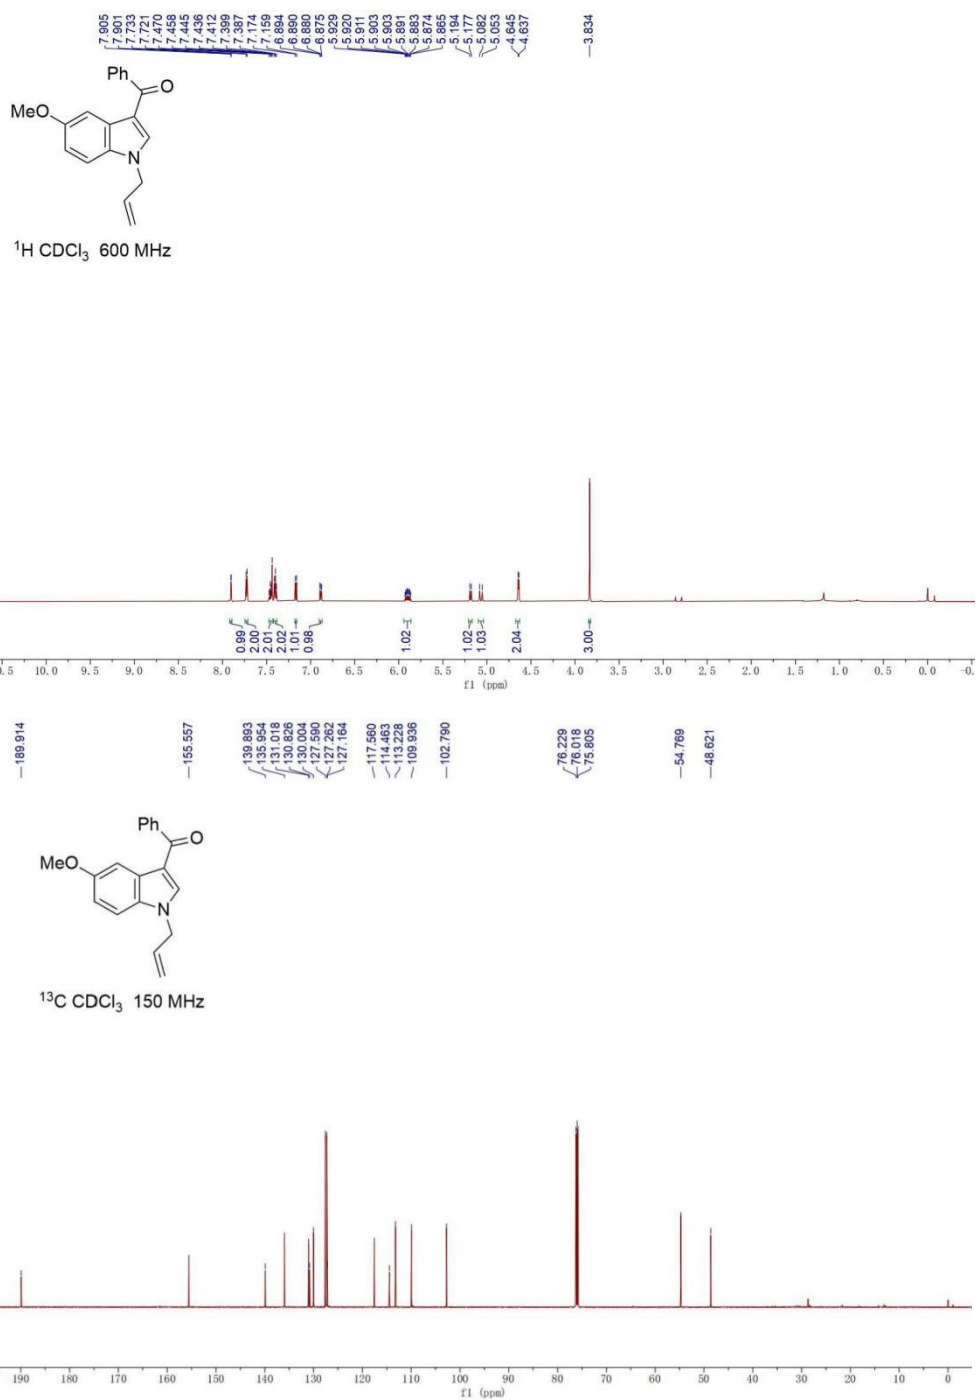

**<sup>1</sup>H NMR (600 MHz, CDCl<sub>3</sub>)**

Chemical structure: COc1ccc(cc1)[C@H](C(=O)N2C(=O)c3ccc(OC)cc3C2=O)Cc4ccc(OC)cc4

Peak list (ppm): 8.489, 8.473, 7.860, 7.781, 7.767, 7.757, 7.743, 7.680, 7.665, 7.668, 7.506, 7.494, 7.482, 7.359, 7.348, 7.344, 7.300, 7.289, 7.286, 7.250, 7.214, 7.210, 7.189, 7.185, 7.175, 7.162, 7.148, 7.087, 7.063, 7.052, 7.047, 3.923, 3.872, 1.682, 1.671.

Integration values: 0.97, 1.01, 1.00, 1.01, 1.01, 1.00, 2.00, 2.00, 5.01, 1.00, 1.01, 3.00, 3.01, 3.00.

**<sup>13</sup>C NMR (150 MHz, CDCl<sub>3</sub>)**

Chemical structure: COc1ccc(cc1)[C@H](C(=O)N2C(=O)c3ccc(OC)cc3C2=O)Cc4ccc(OC)cc4

Peak list (ppm): 191.069, 172.271, 158.112, 157.750, 139.116, 135.946, 133.872, 133.823, 130.941, 130.420, 129.270, 129.210, 128.784, 128.432, 128.387, 125.772, 125.152, 117.776, 117.408, 115.689, 105.675, 104.122, 77.276, 77.065, 76.853, 55.720, 55.402, 46.609, 20.160.



4c

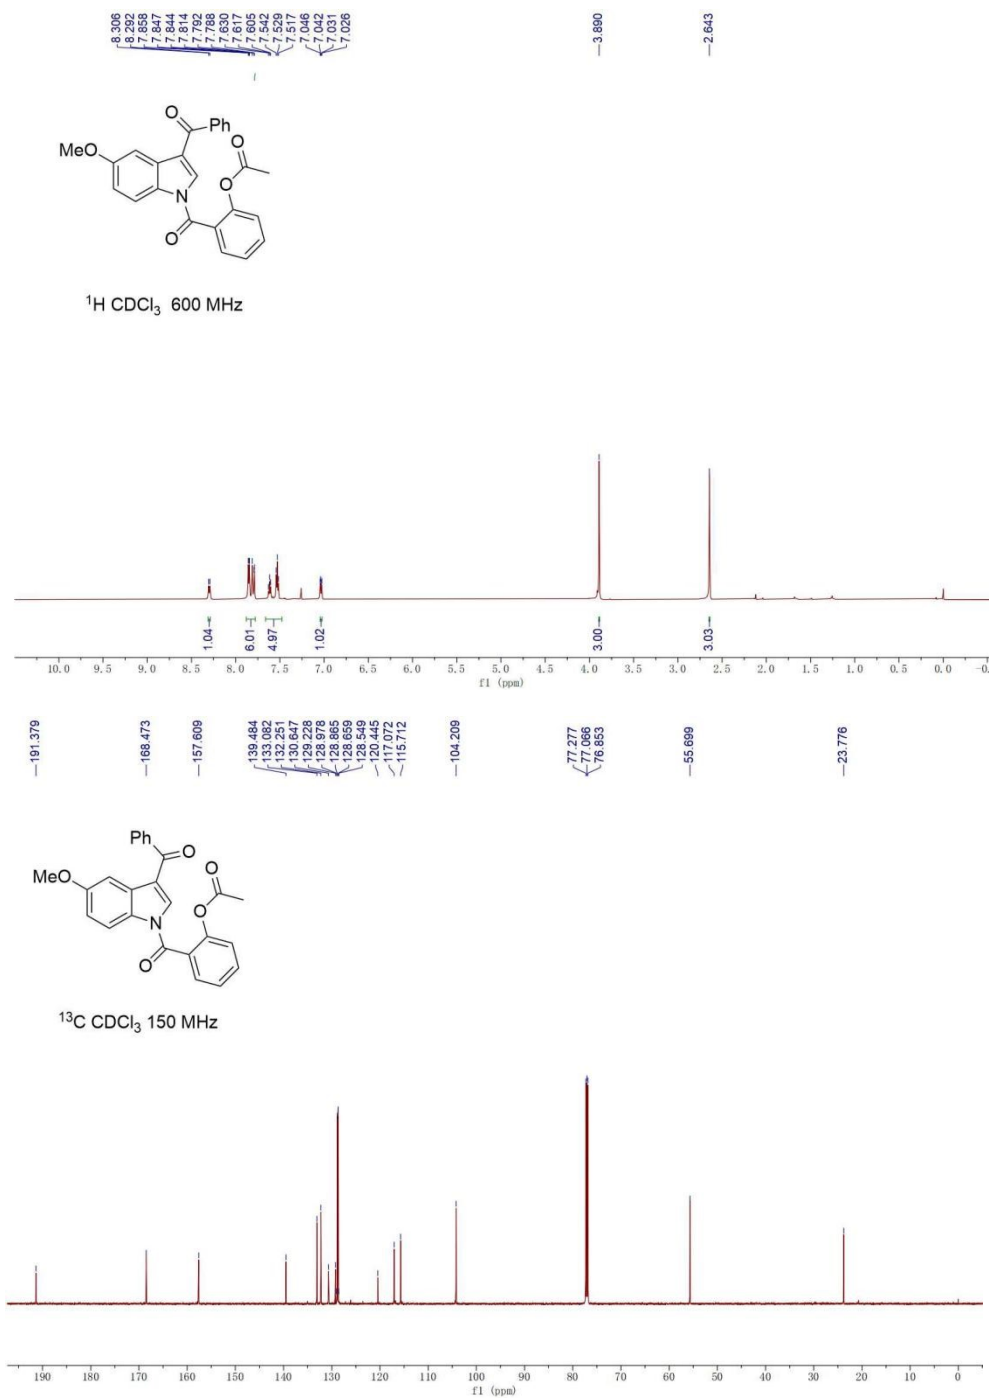

Supplement: d5ob00831j1.pdf [file d5ob00831j1.pdf]
